# Supplementary material for: The first synthesis of N-acetylneuraminic acid 1,7-lactone
Source: Royal Society of Chemistry journal article supplement (doi:10.1039/b810447f), 2008-01-01

Supplementary Material (ESI) for Chemical Communications

**The first Synthesis and complete Characterization of N-Acetylneuraminic Acid 1,7-Lactone**

**Raffaele Colombo, Pietro Allevi, Paola Rota e Mario Anastasia**

mario.anastasia@unimi.it

- (i) General  
5 (ii) 2-Benzyloxycarbonyl-N-acetylneuraminic acid 1,7-lactone **6** (elemental analysis)  
(iii) Preparation of the N-acetylneuraminic acid 1,7-lactone **4a**  
(iv) Preparation of the 4,8,9-tri-O-acetylated 2-benzyloxycarbonyl N-acetylneuraminic acid 1,7-lactone **7**  
(v) Preparation of the 2-methoxy N-acetylneuraminic acid 1,7 lactone **9**  
(vi)  $^1\text{H}/^{13}\text{C}$ -NMR spectra; COSY, HSQC, HMBC for compounds **4a**, **6**, **7** and **9**  
10

**(i) General**

Melting points were measured on a SMP3 mp apparatus (Stuart Scientific, USA) and are not corrected. Nuclear magnetic resonance spectra were recorded at 298 K on Bruker AM-500 spectrometer 15 operating at 500.13 MHz for  $^1\text{H}$  and 125.76 MHz for  $^{13}\text{C}$ . Chemical shifts are reported in parts for million (ppm,  $\delta$  units) relative to  $\text{CD}_3\text{OD}$  signal fixed at 3.31 ppm for  $^1\text{H}$  spectra and to  $\text{CD}_3\text{OD}$  signal fixed at 49.05 ppm for  $^{13}\text{C}$  spectra. Proton and carbon assignments were established, if necessary, with  $^1\text{H}$ - $^1\text{H}$  and  $^1\text{H}$ - $^{13}\text{C}$  correlated NMR experiments.  $^1\text{H}$  NMR data are tabulated in the following order: number of protons, multiplicity (s, singlet; d, doublet; br s, broad singlet; m, multiplet), coupling 20 constant(s) in Hz, assignment of proton(s). Optical rotations were taken at 23°C on a Perkin-Elmer 241 polarimeter and  $[\alpha]_D$  values are given in  $10^{-1} \text{ deg cm}^2 \text{ g}^{-1}$ . Mass spectra were obtained using a Finnigan LCQdeca (ThermoQuest) ion trap mass spectrometer fitted with an electrospray source (ESI). All reactions were monitored by thin-layer chromatography (TLC) carried out on 0.25 mm E. Merck silica gel plates (60 F<sub>254</sub>) using UV light, 50% sulphuric acid and heat as developing agent. E. Merck 230-25 400 mesh silica gel was used for rapid silica gel chromatography.

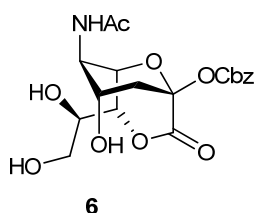

**(ii) 2-Benzyloxycarbonyl-N-acetylneuraminic acid 1,7-lactone 6.**

30 Preparation and physicochemical properties are reported as footnote in the paper.

Found: C, 52.40, H, 5.50, N, 3.60.  $\text{C}_{18}\text{H}_{23}\text{NO}_{10}$  requires C, 52.30, H, 5.61, N, 3.39 %.

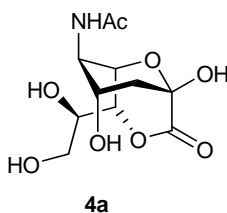

35 (iii) Preparation of the N-acetylneuraminic acid 1,7-lactone **4a**.

The 2-carbobenzyloxy N-acetylneuraminic acid 1,7-lactone **6** (425.5 mg, 1.0 mmol) was dissolved in ethyl acetate (350 mL) and hydrogenated in the presence of 10% Pd/C (200.0 mg) for 4 h. At this time, the catalyst was filtered and the solvent was evaporated under reduced pressure. Then the solid residue was dried to afford the title compound **4a** (270,6 mg, Yeld 93%): mp 110-113 °C (dec., in sealed tube);  $[\alpha]_D^{25} = +23$  (THF,  $c = 1$ ). Other characteristic are in the paper as selected data.  
Found: C, 45.20; H, 6.00, N, 5.00  $C_{11}H_{17}NO_8$  require C, 45.36; H, 5.88, N, 4.81 %.

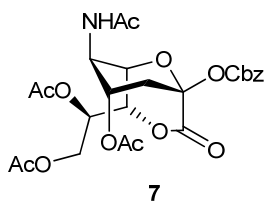

**10 (iv) Preparation of the 4,8,9-tri-O-acetylated 2-benzyloxycarbonyl N-acetylneuraminic acid 1,7-lactone 7.** The 2-benzyloxycarbonyl N-acetylneuraminic acid 1,7-lactone **6** (213.0 mg, 0.5 mmol) was dissolved in pyridine (1.5 mL) and treated with acetic anhydride (0.70 mL) containing a trace of 4-dimethylamino pyridine, for 24 h at 23 °C. At this time methanol was added to the mixture and the solution was concentrated. The residue was recovered with ice cold water and extracted with ethyl acetate. The organic layers were washed with an aqueous  $NaHCO_3$  solution and then with water, to afford, after evaporation of the solvent under reduced pressure, a crude compound which was purified by column chromatography on silica, eluting first less polar impurities, with ethyl acetate, then compound **7**, with a mixture of methanol in ethyl acetate (1%, v/v). The obtained compound **7**, a glass, showed:  $[\alpha]_D^{25} +41$  ( $CHCl_3$ ,  $c = 1$ );  $\delta_H$  (500.13 MHz;  $CD_3OD$ ,  $T = 298$  K) 7.39 (5H, m, Ph), 5.51 (1H, ddd,  $J_{9a,8}$  2.6 Hz,  $J_{9b,8}$  4.7 Hz,  $J_{8,7}$  7.6 Hz, H-8), 5.23 (2H, AB system,  $CH_2Ph$ ), 5.12 (1H, br m,  $J_{4,3a}$  3.77 Hz,  $J_{4,3b}$  1.3 Hz, H-4), 4.84 (1H, d,  $J_{8,7}$  7.6 Hz, H-7), 4.67 (1H, dd,  $J_{9a,8}$  2.6 Hz,  $J_{9a,9b}$  12.5 Hz, H-9a), 4.44 (1H, br s, H-6), 4.28 (1H, dd,  $J_{9b,8}$  4.7 Hz,  $J_{9a,9b}$  12.5, H-9b), 4.12 (1H, br s, H-5), 2.41 (1H, dd,  $J_{4,3a}$  3.8,  $J_{3a,3b}$  14.7 Hz, H-3a), 2.28 (1H,  $J_{4,3b}$  1.3 Hz,  $J_{3a,3b}$  14.7 Hz, H-3b), 2.094 (3H, s,  $CH_3COO$  at C-9), 2.090 (3H, s,  $CH_3COO$  at C-8), 2.048 (3H, s,  $CH_3COO$  at C-4), 2.027 (3H, s,  $CH_3CONH$ );  $\delta_C$  (125.76 MHz;  $CD_3OD$ ,  $T = 298$  K) 173.1 ( $CH_3CONH$ ), 172.4 ( $CH_3COO$  at C-9), 171.6 ( $CH_3COO$  at C-8), 170.5 ( $CH_3COO$  at C-4), 166.7 (C-1), 153.5 ( $PhCH_2OCOO$ ), 136.2, 129.9, 129.7, 129.5 (Ph), 94.6 (C-2), 78.3 (C-7), 73.1 (C-6), 71.8 ( $PhCH_2OCOO$ ), 71.7 (C-8), 69.2 (C-4), 62.8 (C-9), 50.1 (C-5), 34.1 (C-3), 22.5 ( $CH_3CONH$ ), 20.8 ( $CH_3COO$  at C-8), 20.7 ( $CH_3COO$  at C-4), 20.6 ( $CH_3COO$  at C-9). MS (ESI positive):  $m/z$  574.2 ( $M+Na^+$ ), 606.1 ( $2M+Na^+MeOH$ ), 1124 ( $2M+Na^+$ ).  
Found: C, 53.40, H, 5.30, N, 2.50.  $C_{24}H_{29}NO_{13}$  requires C, 53.43, H, 5.42, N, 2.60 %.

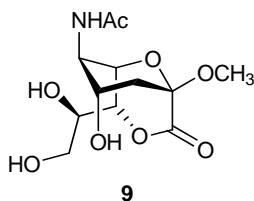

**(v) Preparation of the 2-methoxy N-acetylneuraminic acid 1,7 lactone 9.** CbzCl (0.4 mL, 2.8 mmol) dissolved in THF (1.5 mL) was added drop wise to a solution of anhydrous THF (2.5 mL) containing triethylamine (0.5 mL; 3.6 mmol) under stirring, at 0°C. At this point the 2-methoxy-N-acetylneuraminic acid **8** (94.0 mg; 2.91 mmol) was added, followed by DMF (3.0 mL). The mixture was then stirred at 23 °C for 24 h. At this time MeOH (4 mL) is added and stirring is continued for 2 h. After evaporation of the MeOH-THF mixture, the residue DMF was removed under high vacuum to afford a crude residue which was chromatography on silica (eluting with 10% MeOH

in AcOEt), to give the pure lactone **9** (67.0 mg; 73% Y). The compound, a glass, showed:  $[\alpha]_D = +15$  (CH<sub>3</sub>OH, *c* = 1); IR, (nujol) 3332, 1760 cm<sup>-1</sup>;  $\delta_H$  (500.13 MHz; CD<sub>3</sub>OD, T =298 K) 4.57 (1H, br s, H-6), 4.45 (1H, d,  $J_{8,7}$  7.8 Hz, H-7), 4.03 (1H, m,  $J_{4,3b}$  2.1 Hz,  $J_{4,3a}$  3.3 Hz, H-4), 3.95 (1H, br s, H-5), 3.79 (1H, dd,  $J_{9a,8}$  3.1 Hz,  $J_{9a,9b}$  10.8 Hz, H-9a), 3.75 (1H, ddd,  $J_{9a,8}$  3.1 Hz,  $J_{8,7}$  7.8 Hz,  $J_{9b,8}$  4.6 Hz, H-8), 3.70 (1H, dd,  $J_{9b,8}$  4.6 Hz,  $J_{9a,9b}$  10.8 Hz, H-9b), 3.33 (3H, s, CH<sub>3</sub>O), 2.76 (1H, dd,  $J_{4,3a}$  3.3 Hz,  $J_{3a,3b}$  14.1 Hz, H-3a), 2.02 (1H, dd,  $J_{4,3b}$  2.1 Hz,  $J_{3a,3b}$  14.1 Hz, H-3b), 2.00 (3H, s, CH<sub>3</sub>CONH);  $\delta_C$  (125.76 MHz; CD<sub>3</sub>OD, T =298 K) 173.0 (CH<sub>3</sub>CONH), 170.0 (C-1), 96.3 (C-2), 79.7 (C-7), 73.2 (C-8), 72.1 (C-6), 67.6 (C-4), 63.6 (C-9), 52.8 (C-5), 51.6 (CH<sub>3</sub>O), 37.8 (C-3), 22.5 (CH<sub>3</sub>CONH). MS (ESI negative): *m/z* 304.4 (M-H), 609.1 (2M-H).

10 Found: C, 47.00; H, 6.30, N, 4.70 C<sub>12</sub>H<sub>19</sub>NO<sub>8</sub> requires C, 47.21; H, 6.27, N, 4.59 %.

(vii) <sup>1</sup>H/<sup>13</sup>C-NMR spectra; COSY, HSQC, HMBC for compounds **4a**, **6**, **7** and **9**.  
(Copies are reported).

15

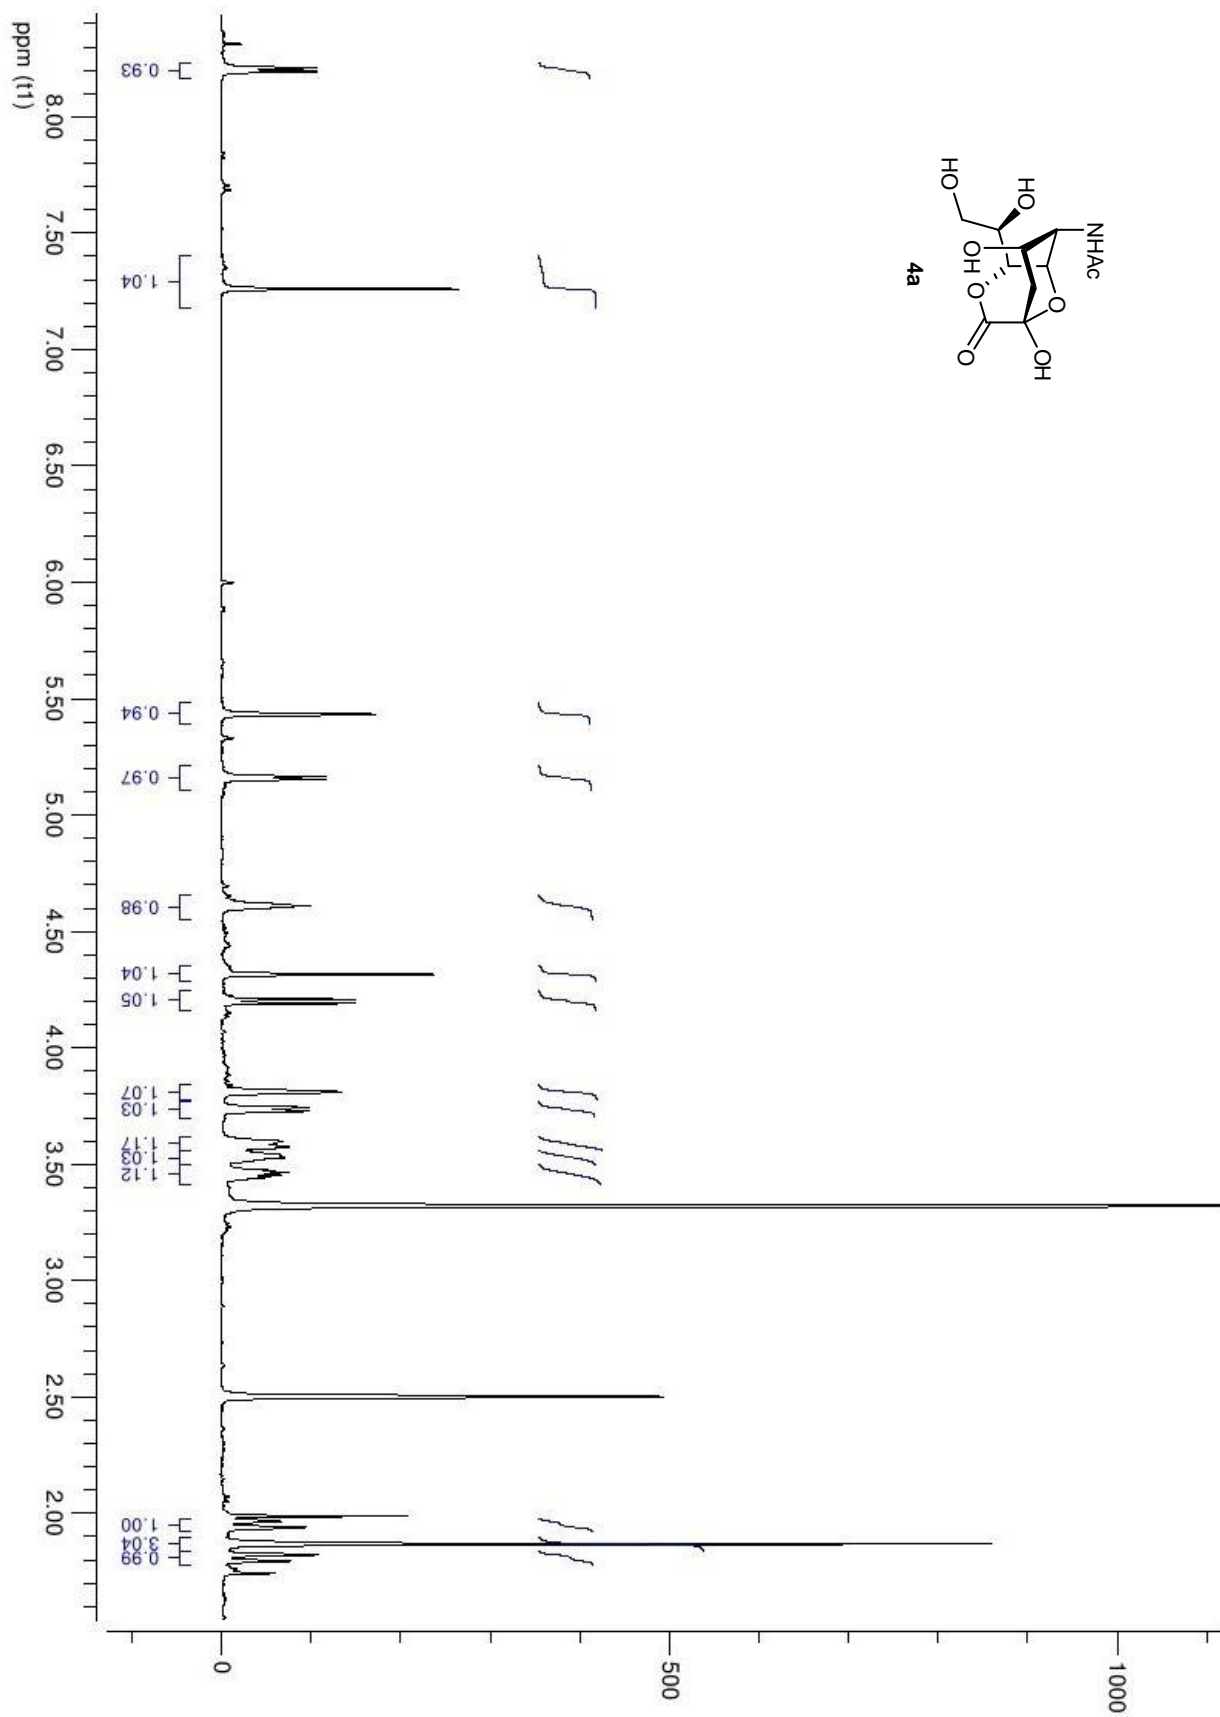

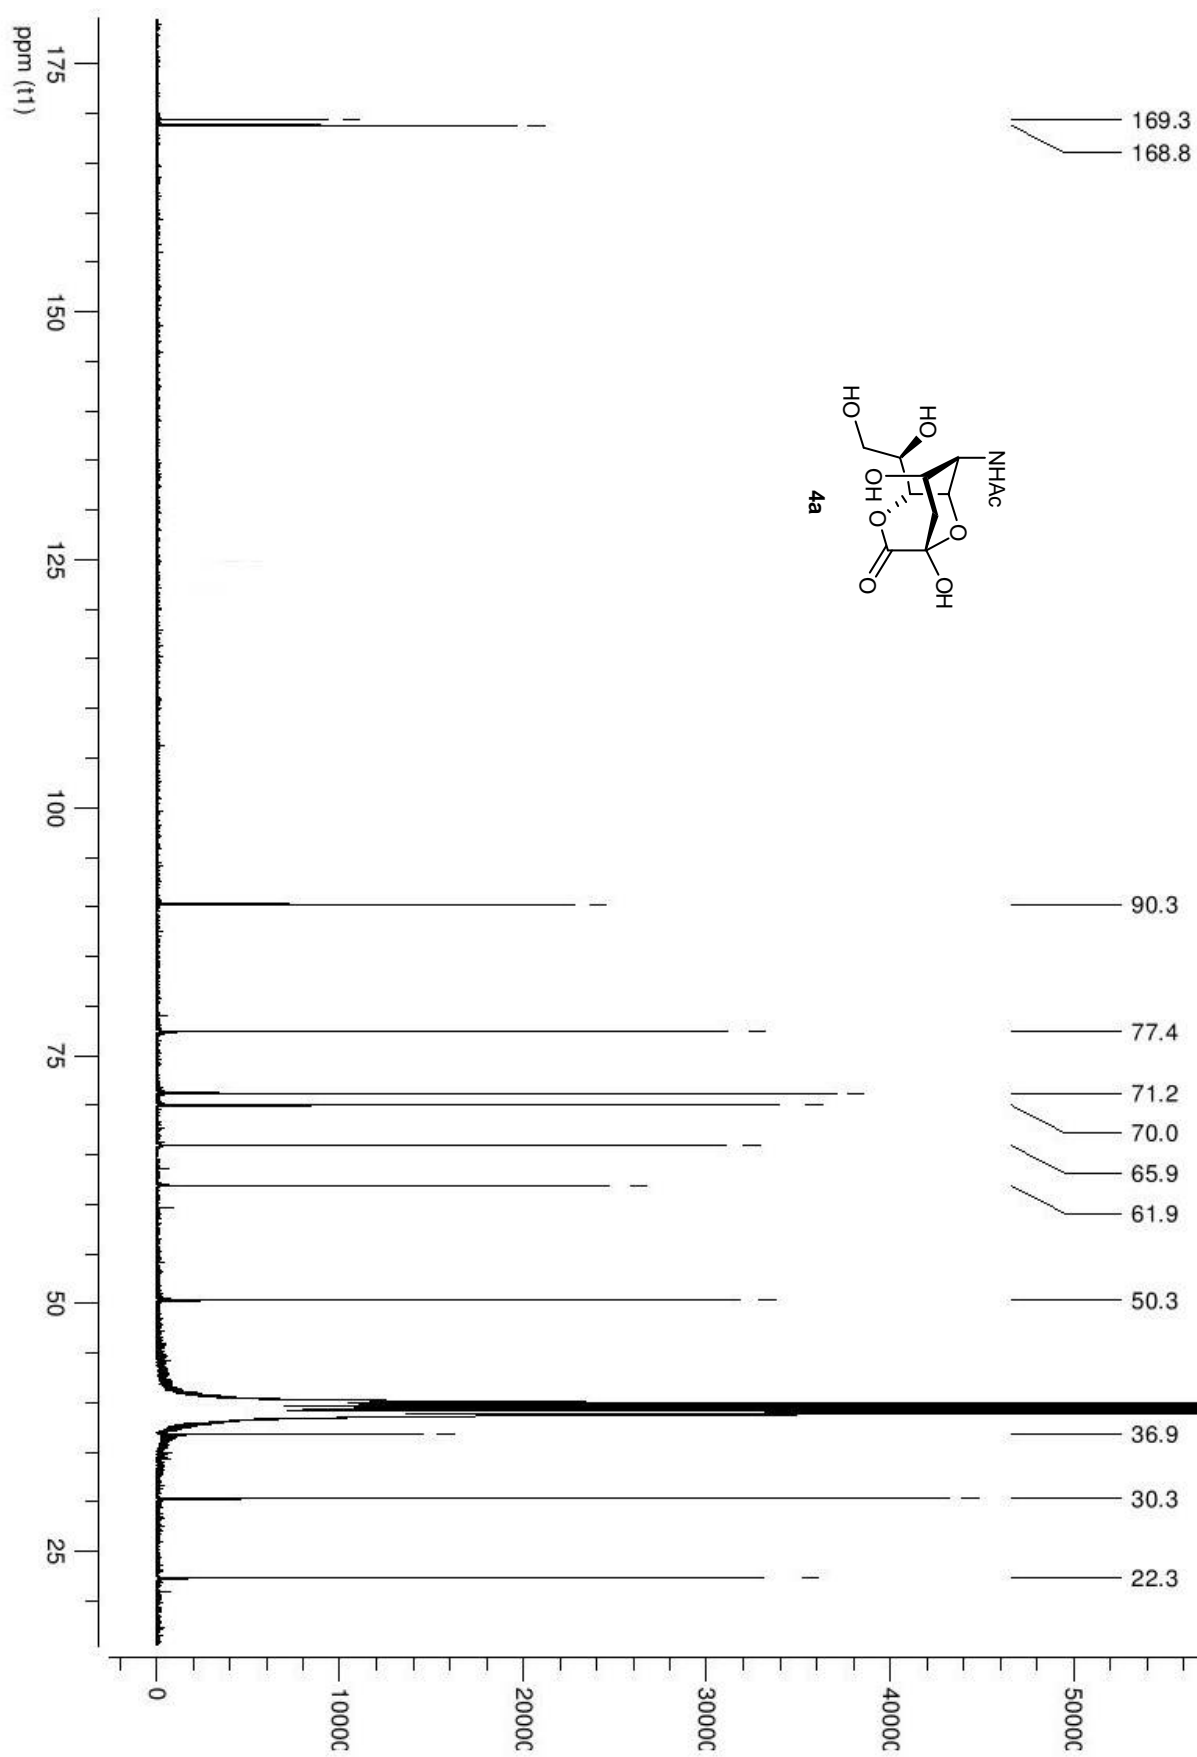

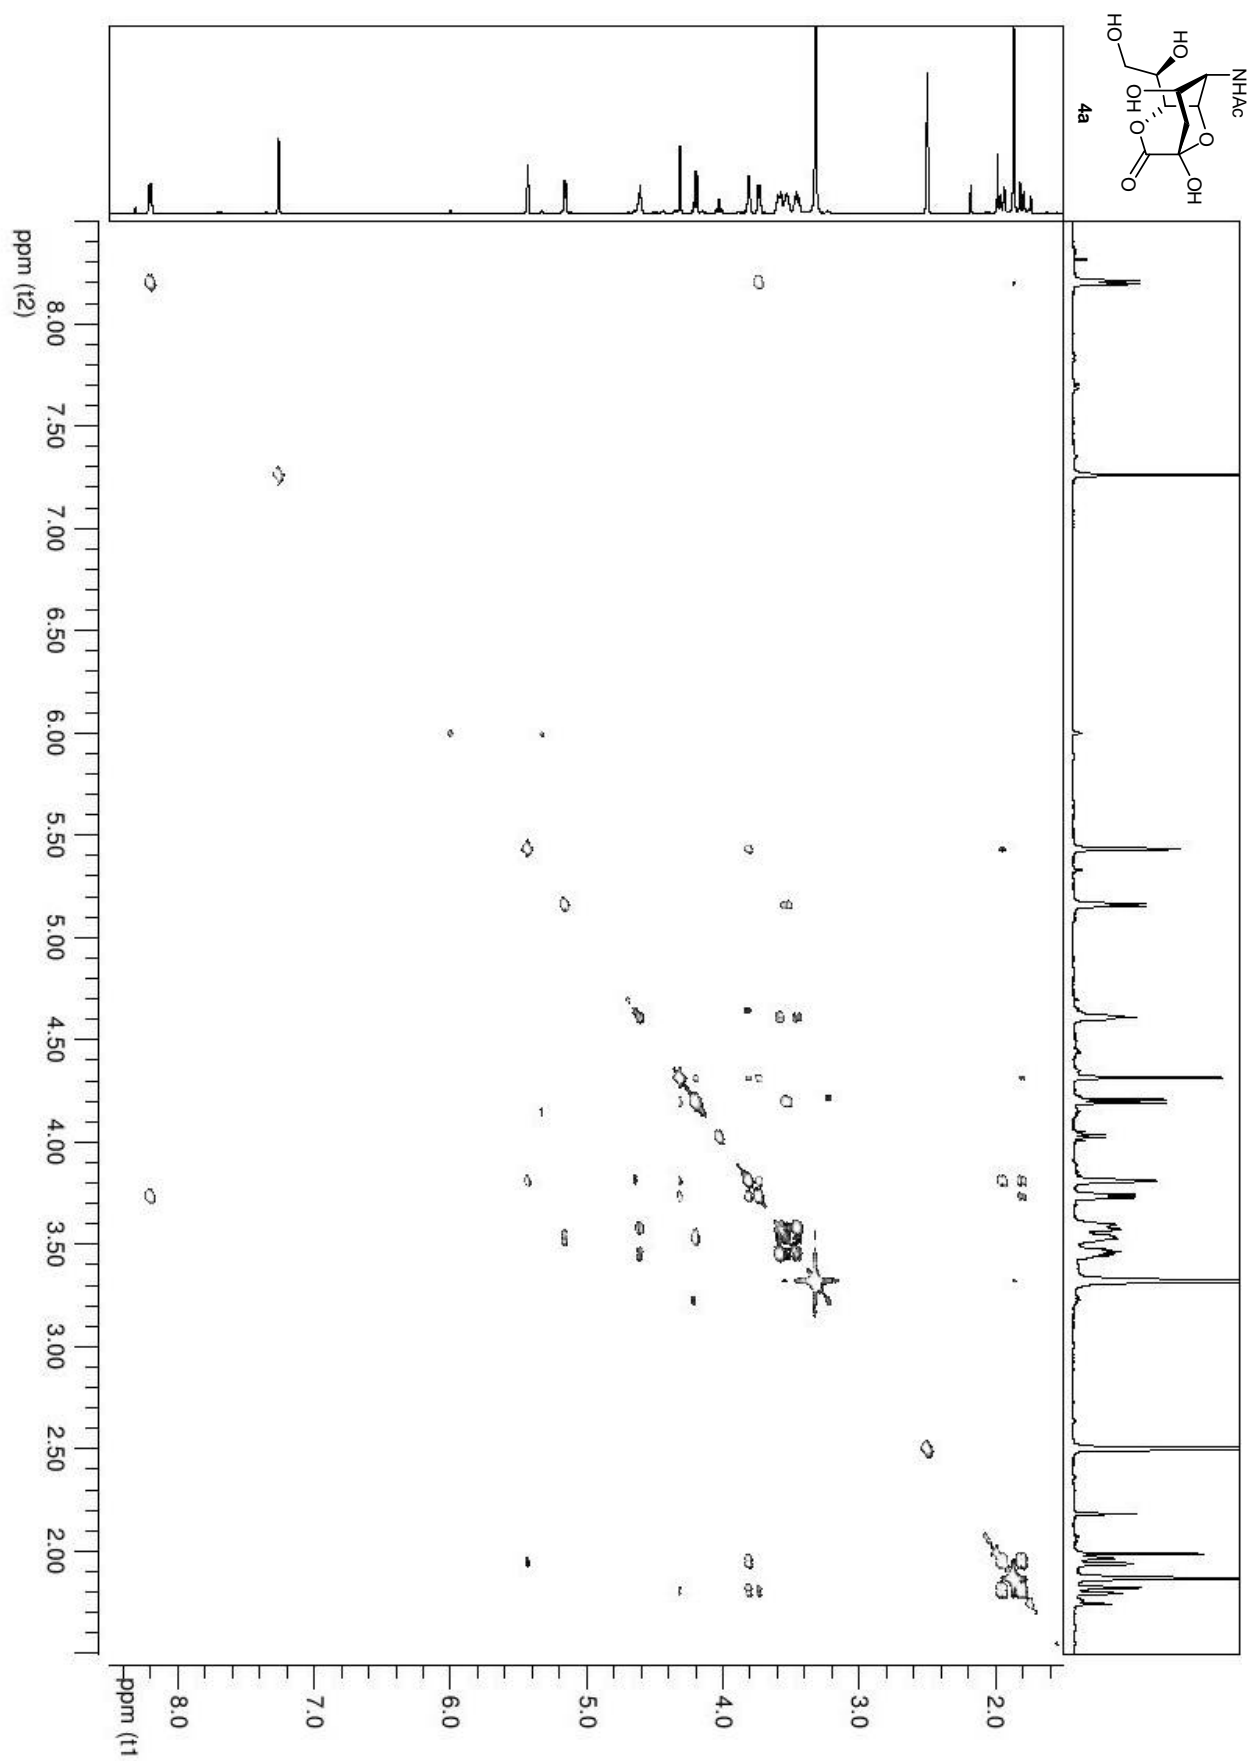

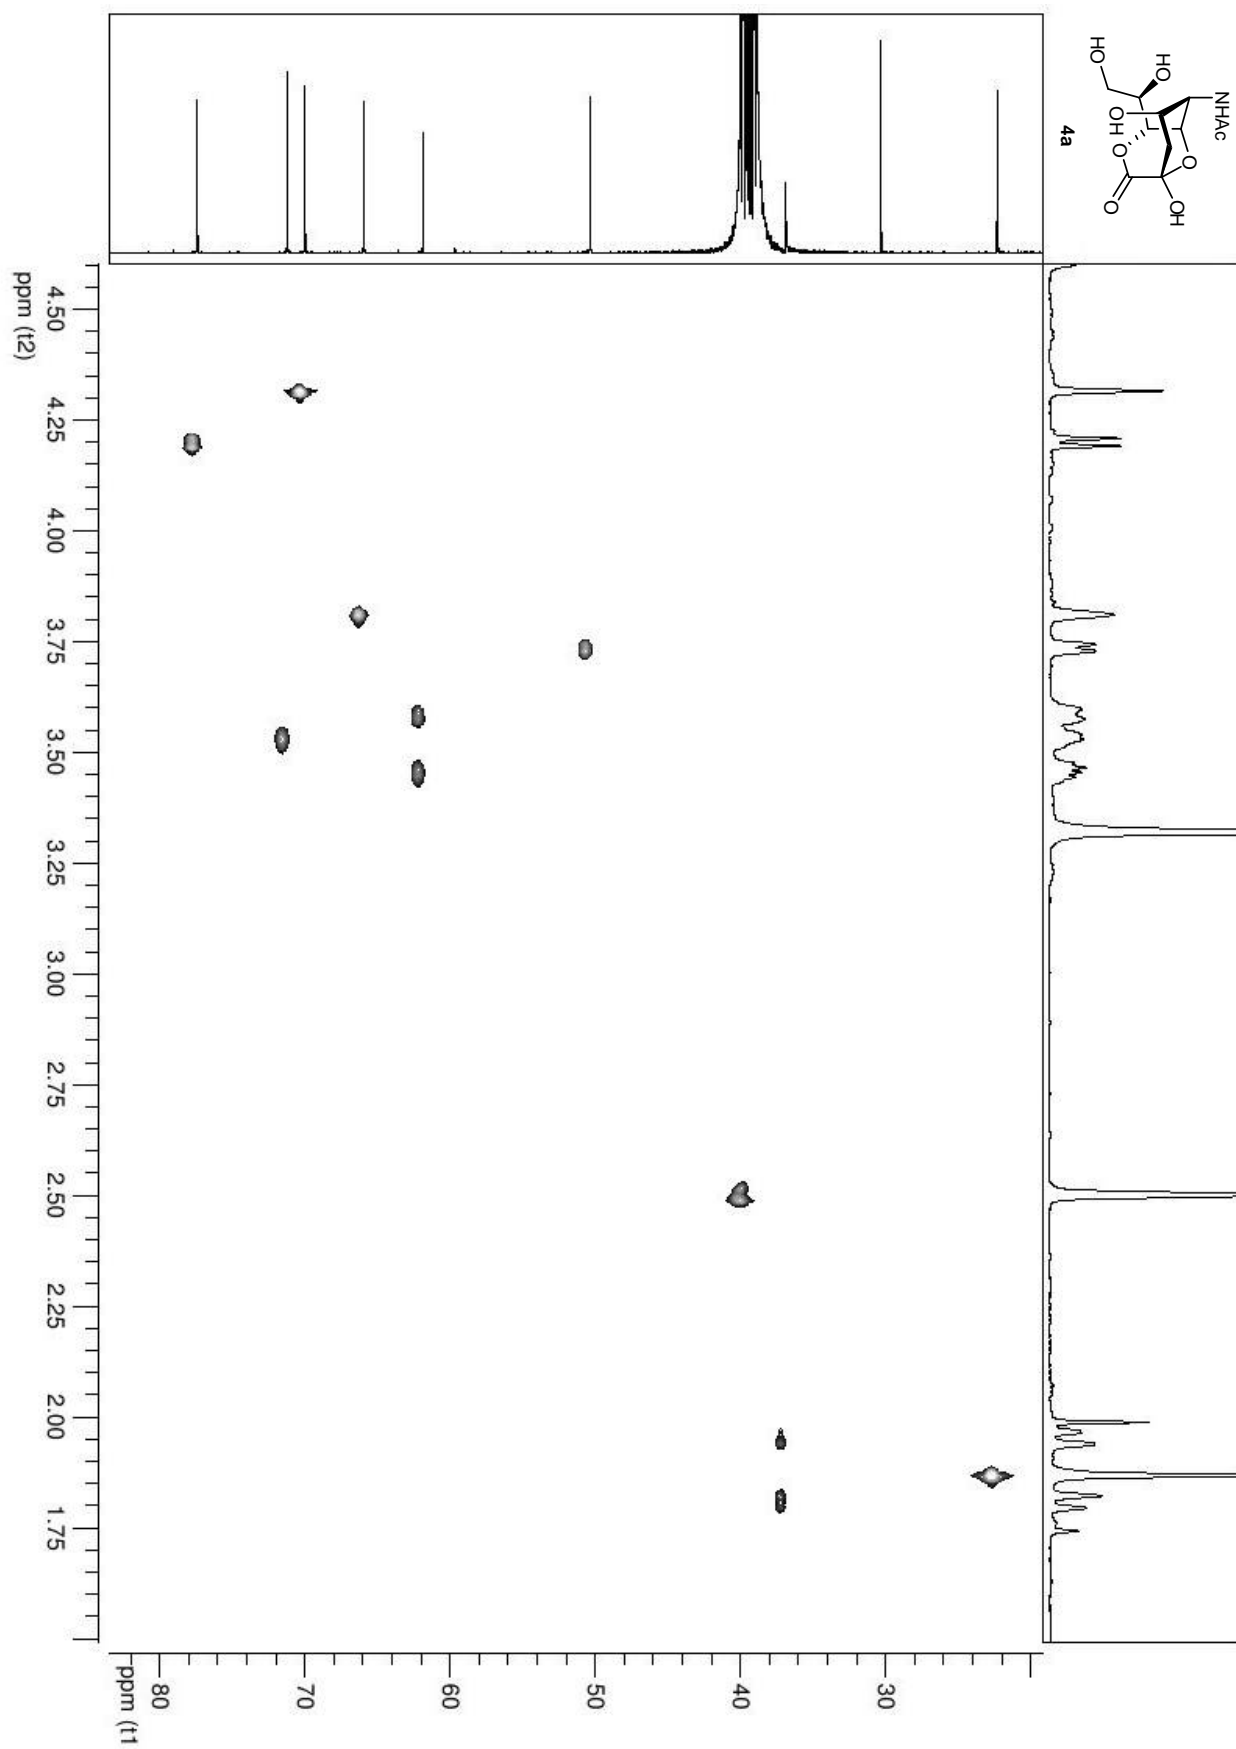

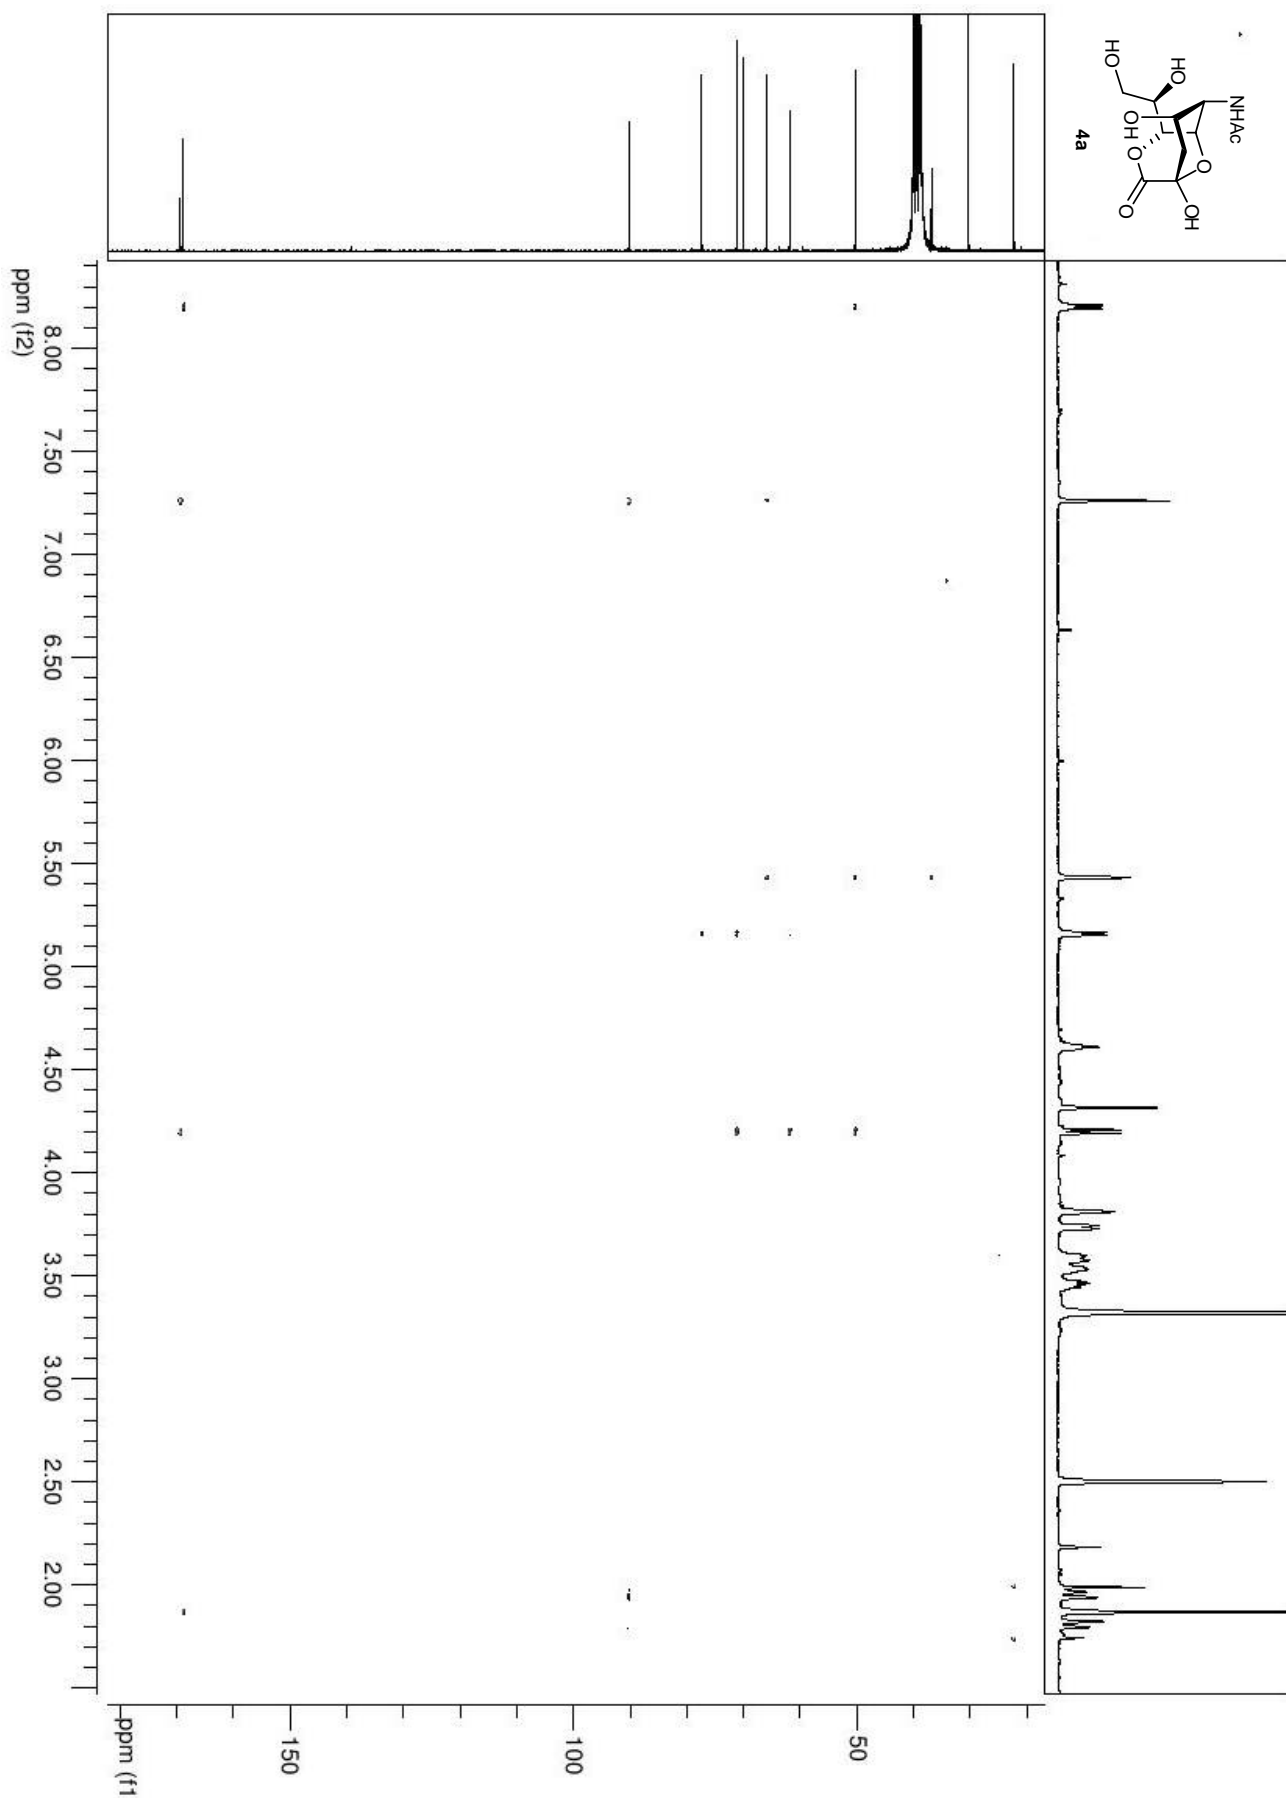



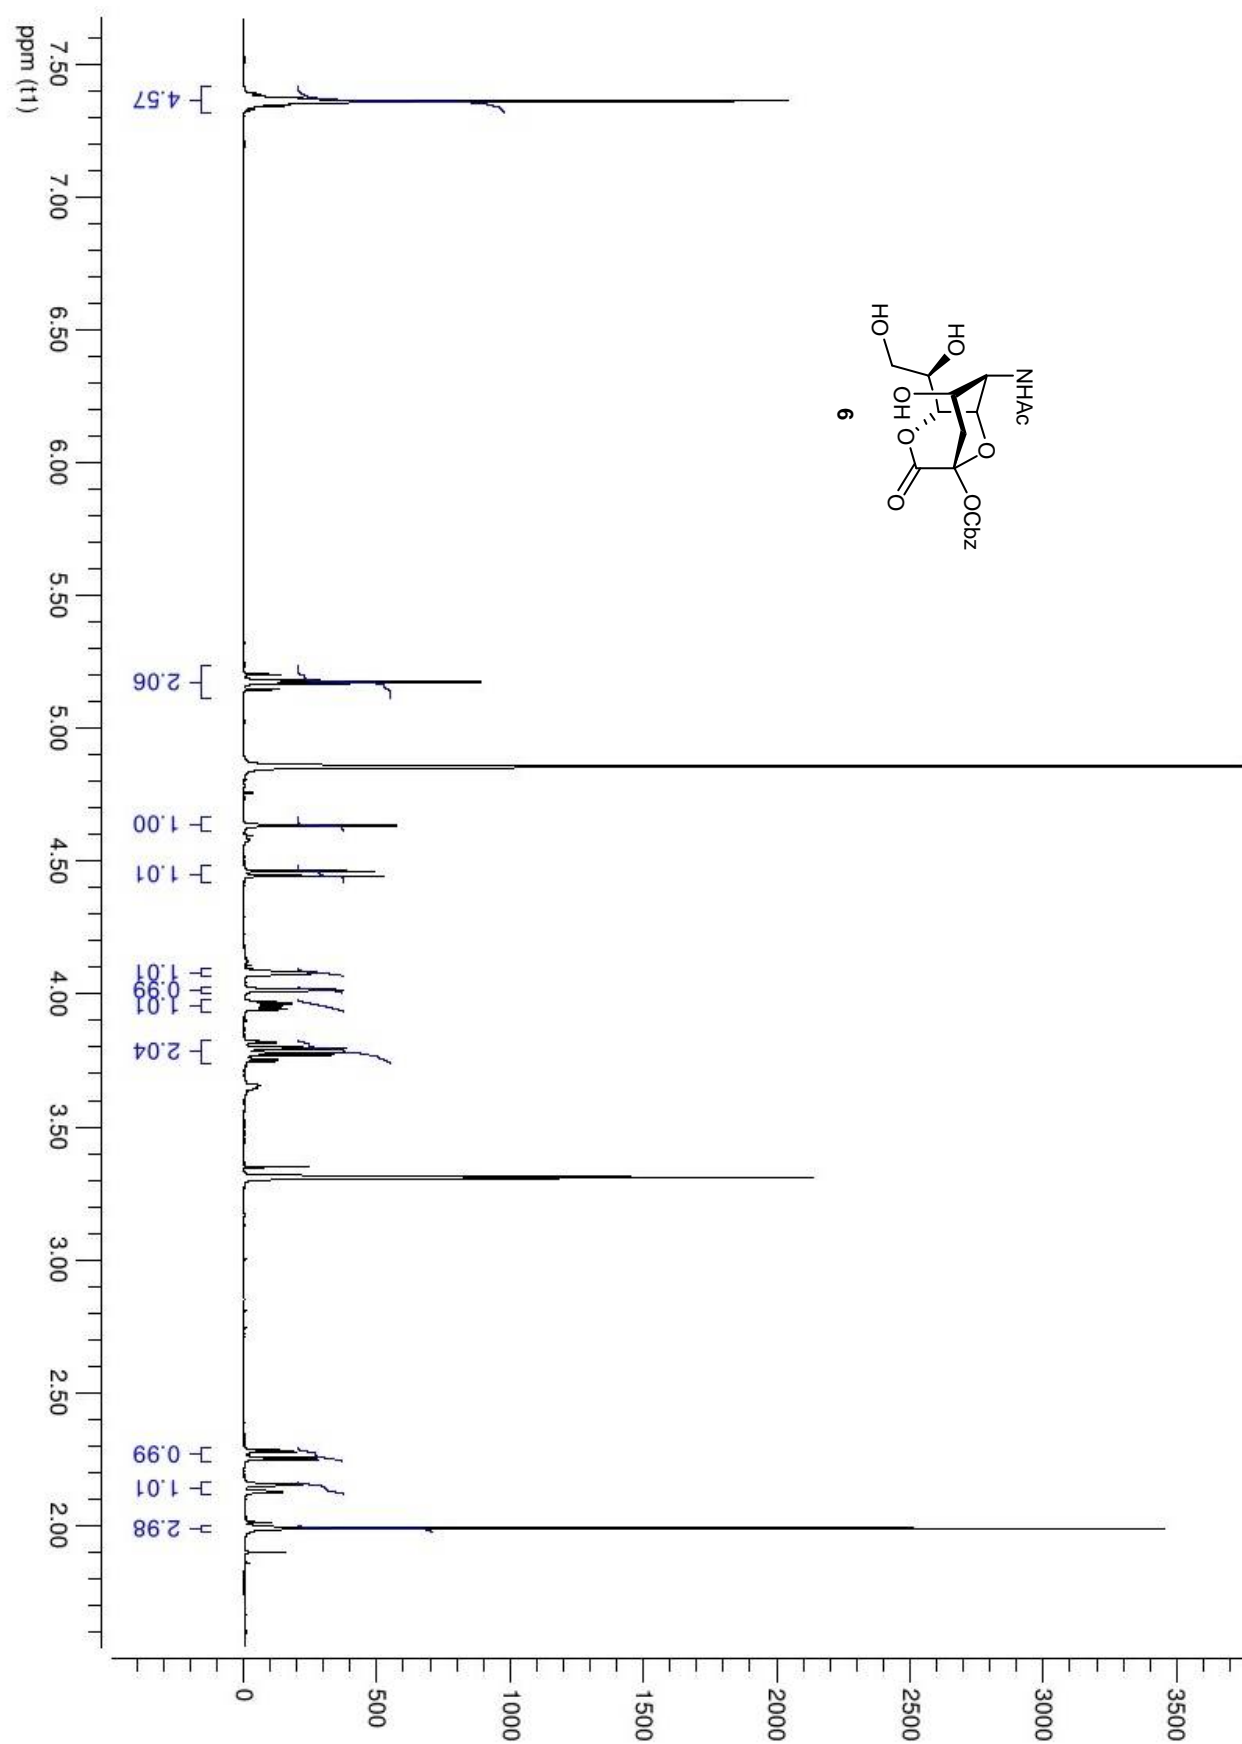

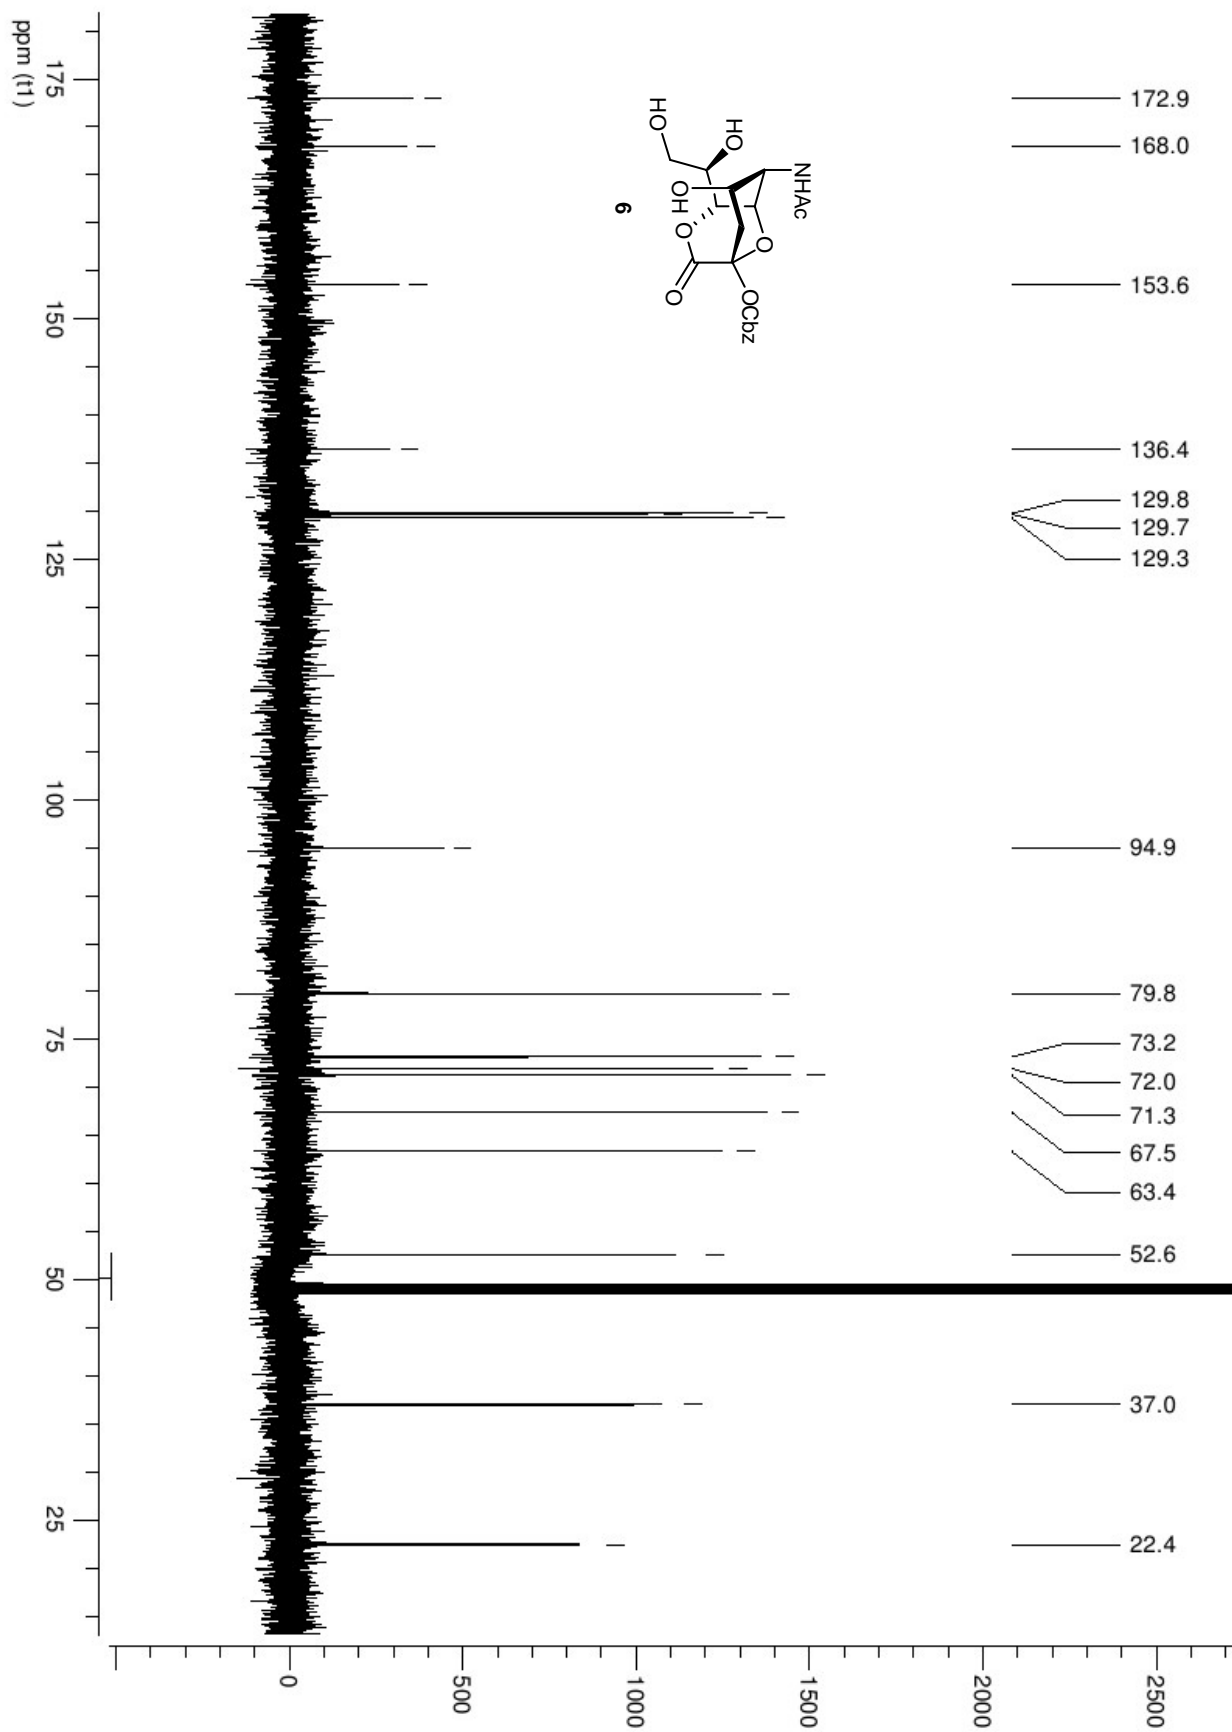

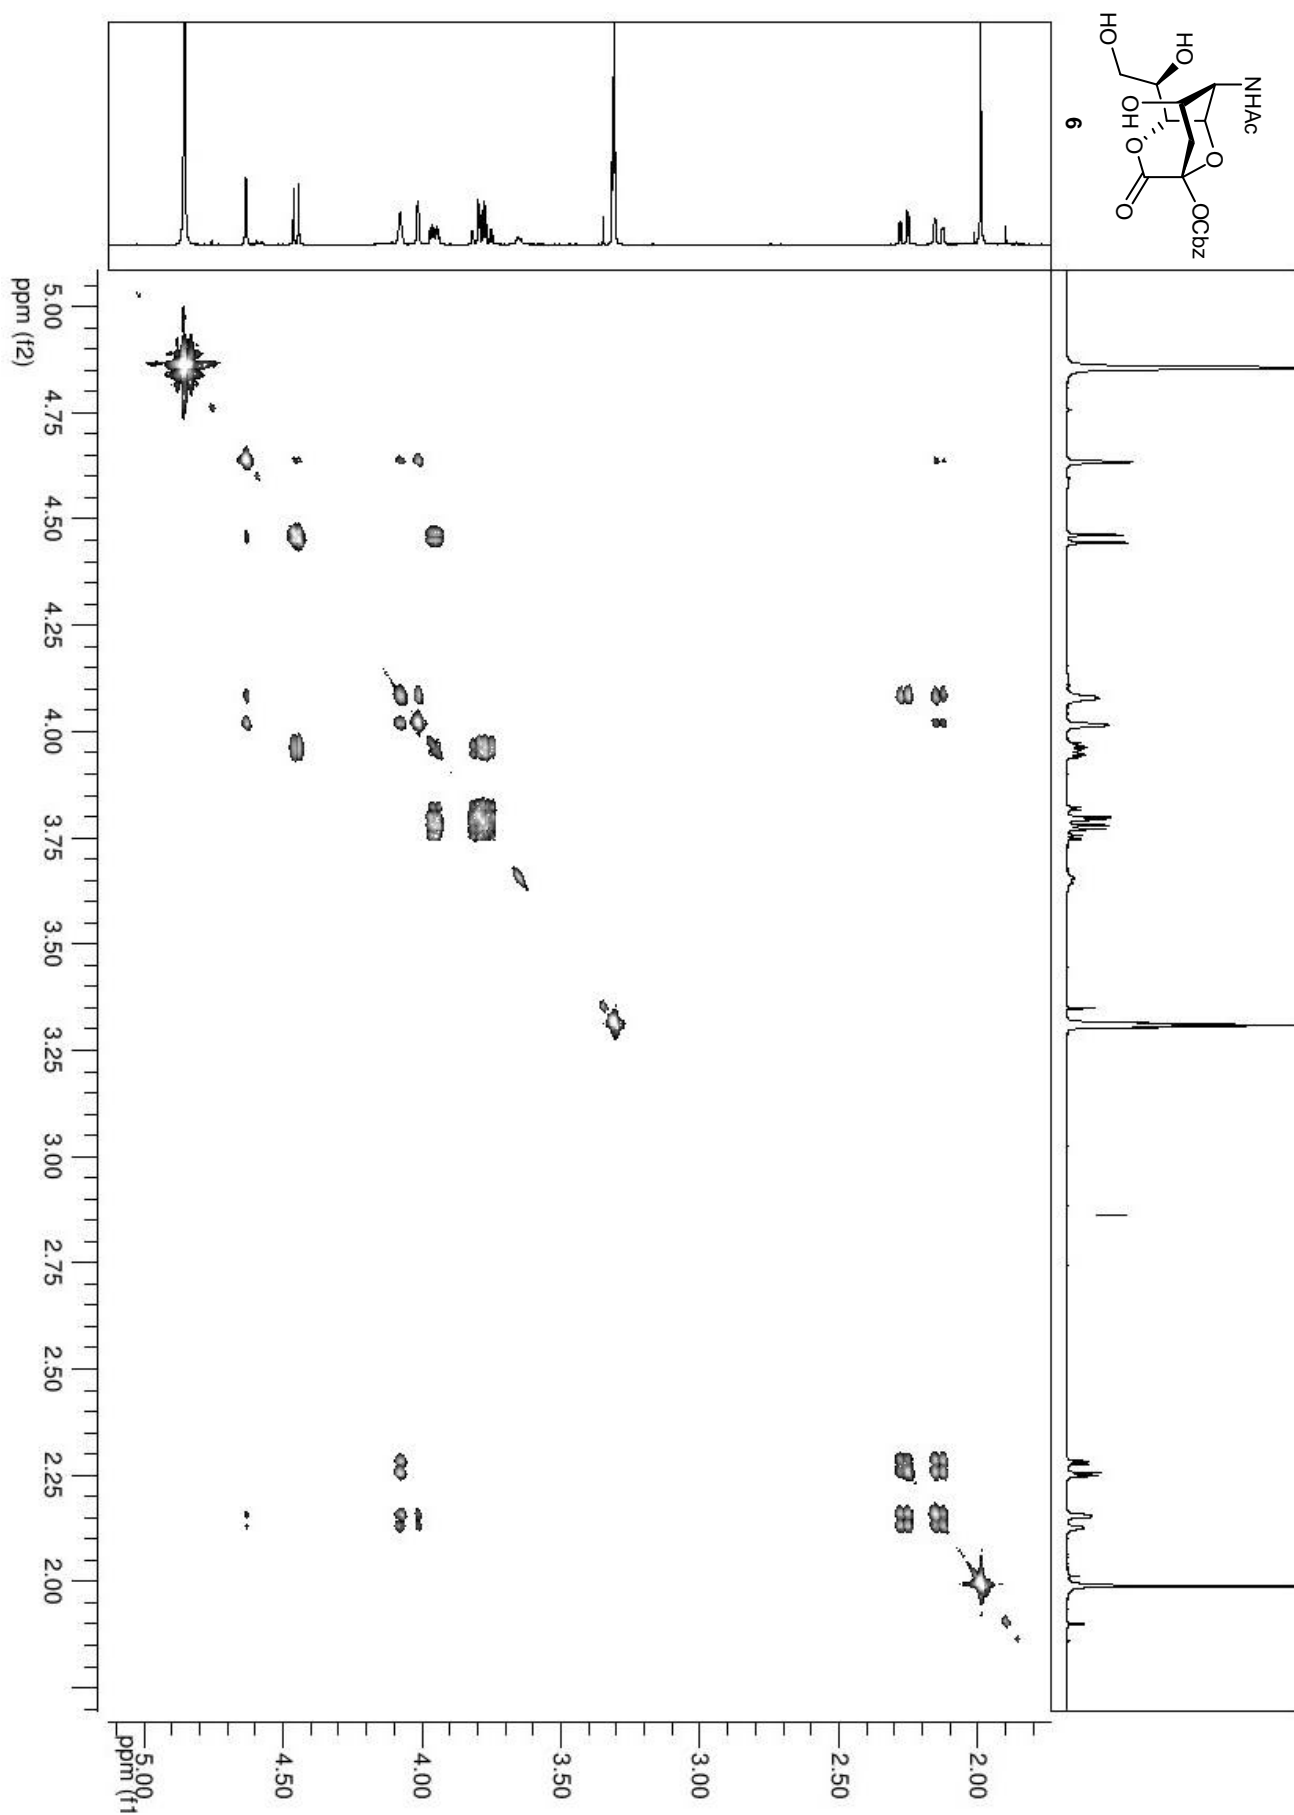

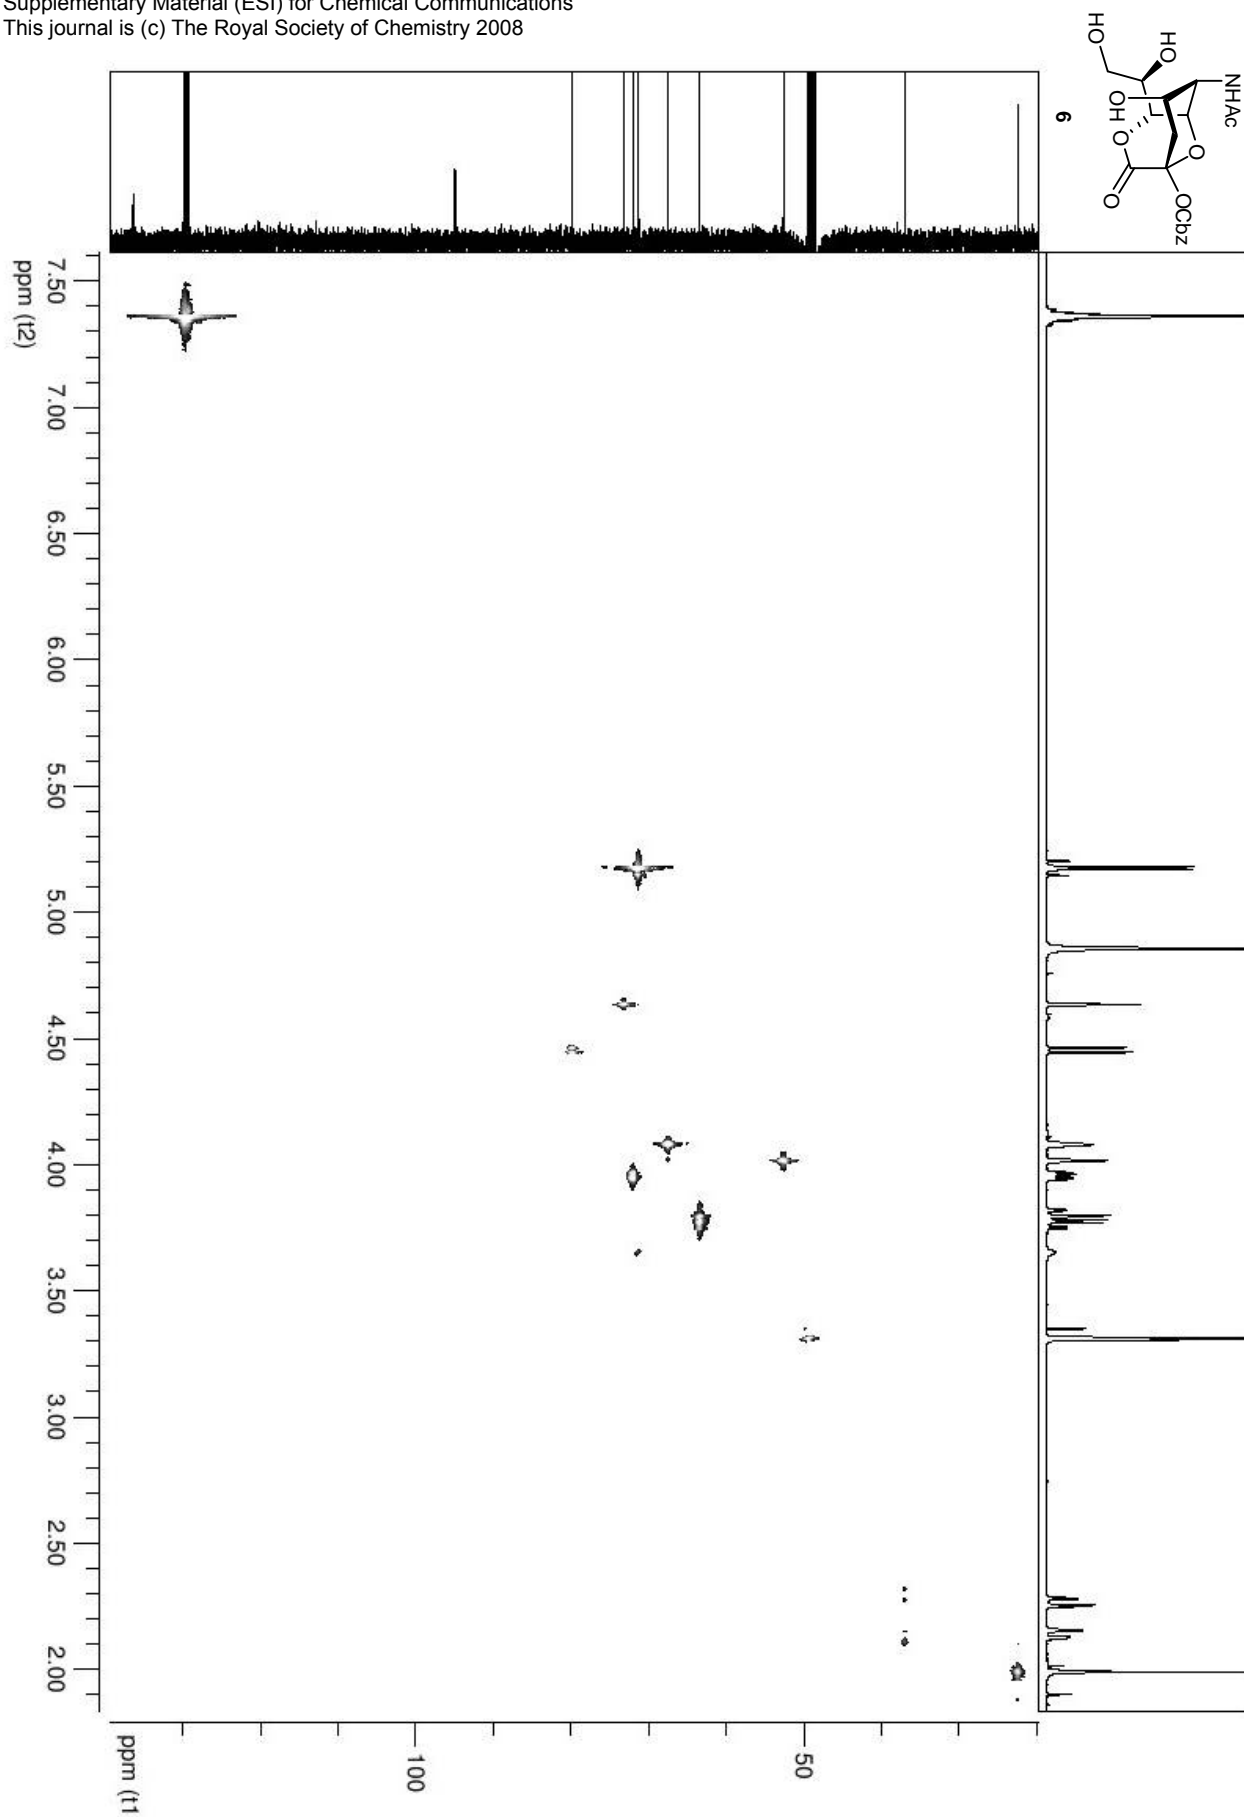

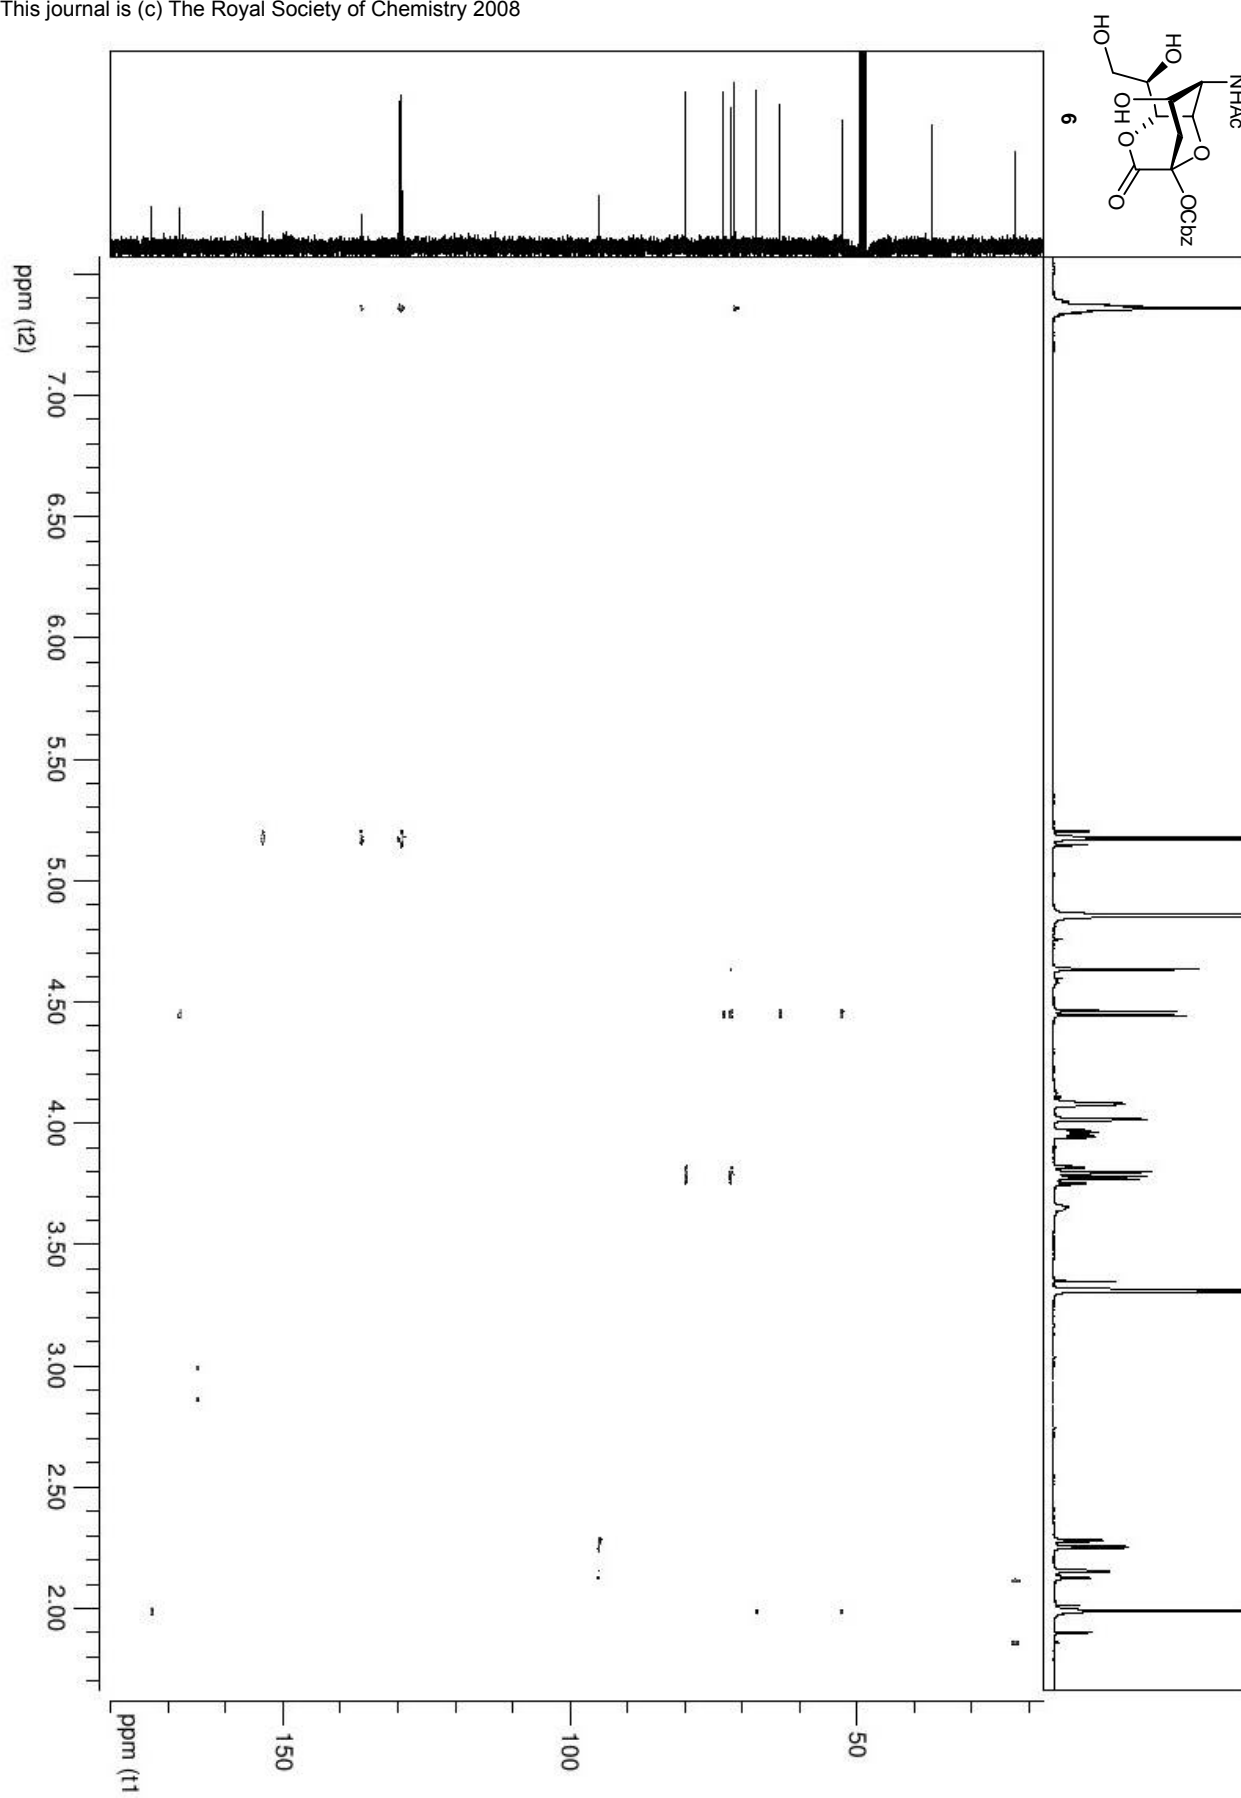

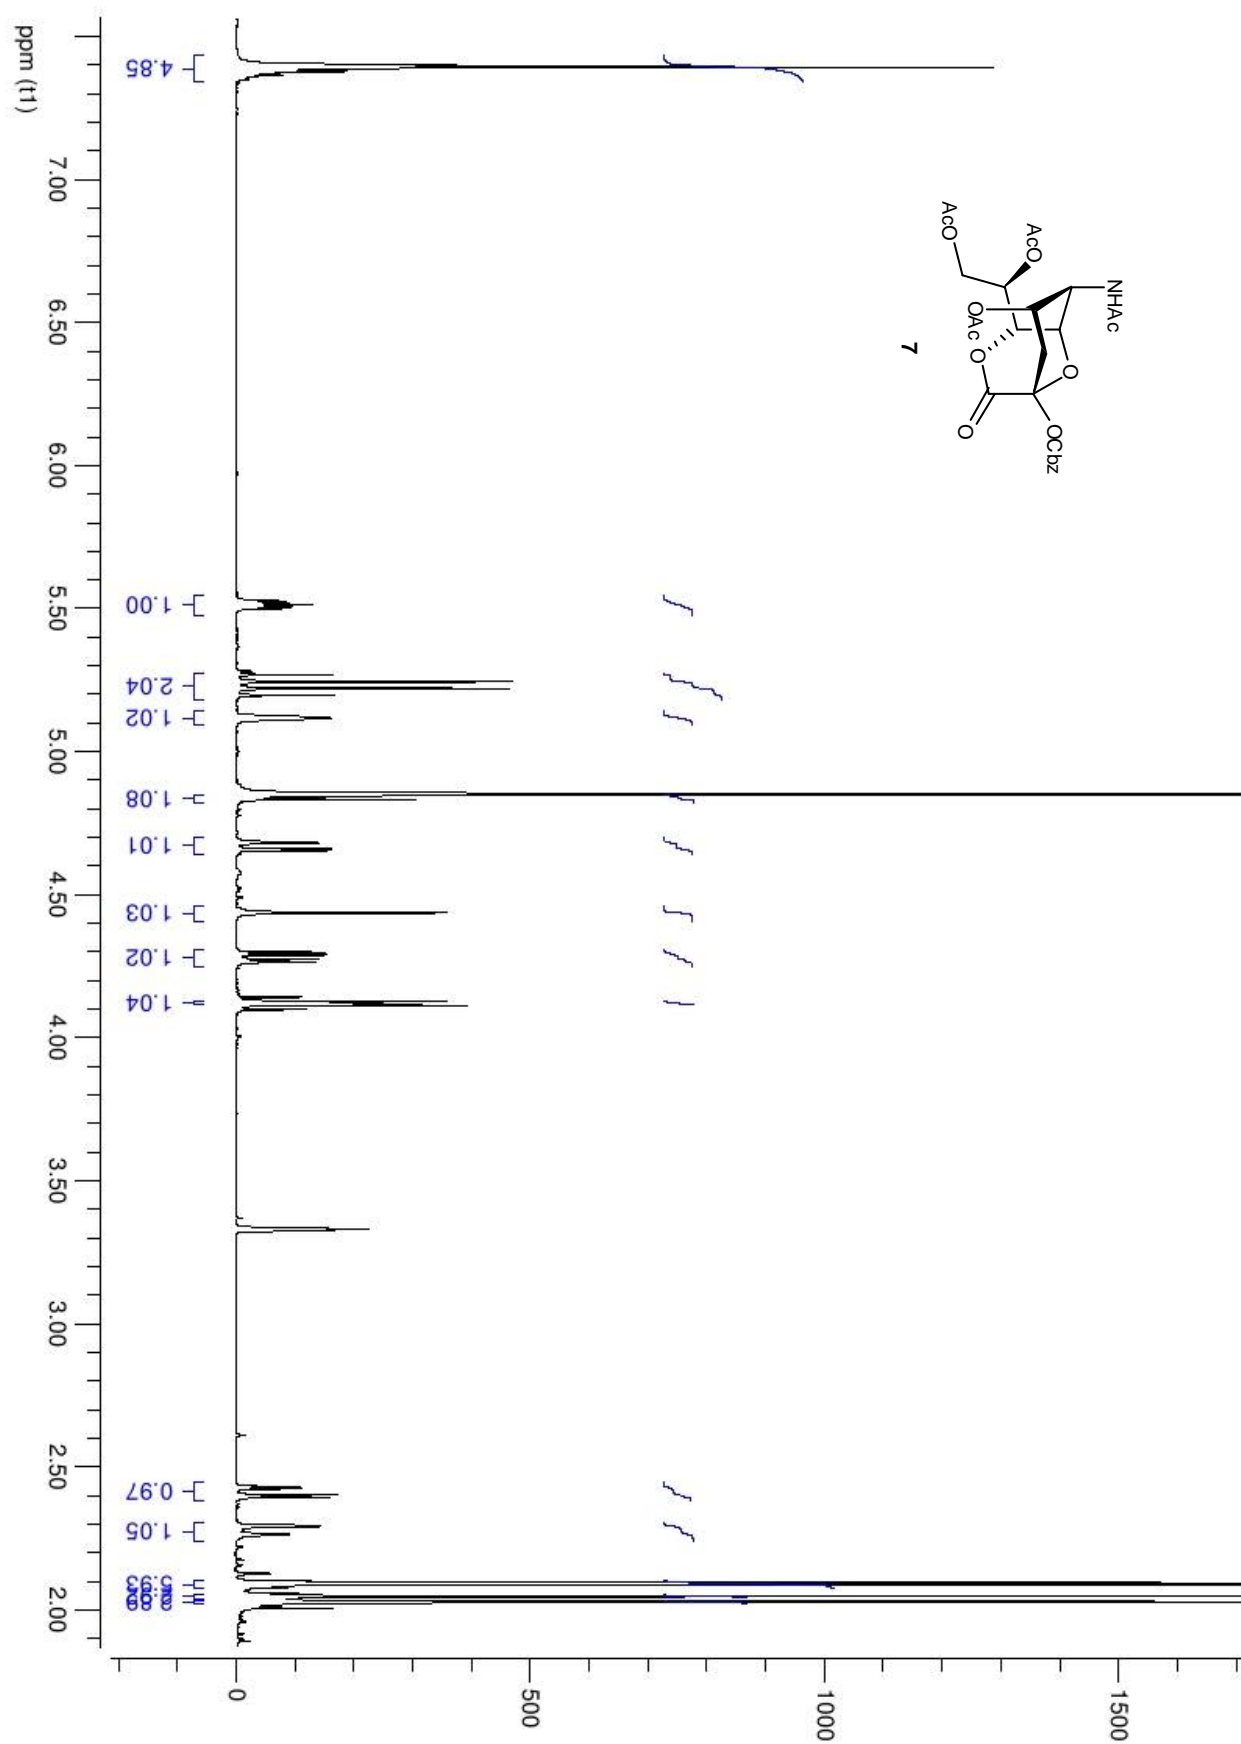

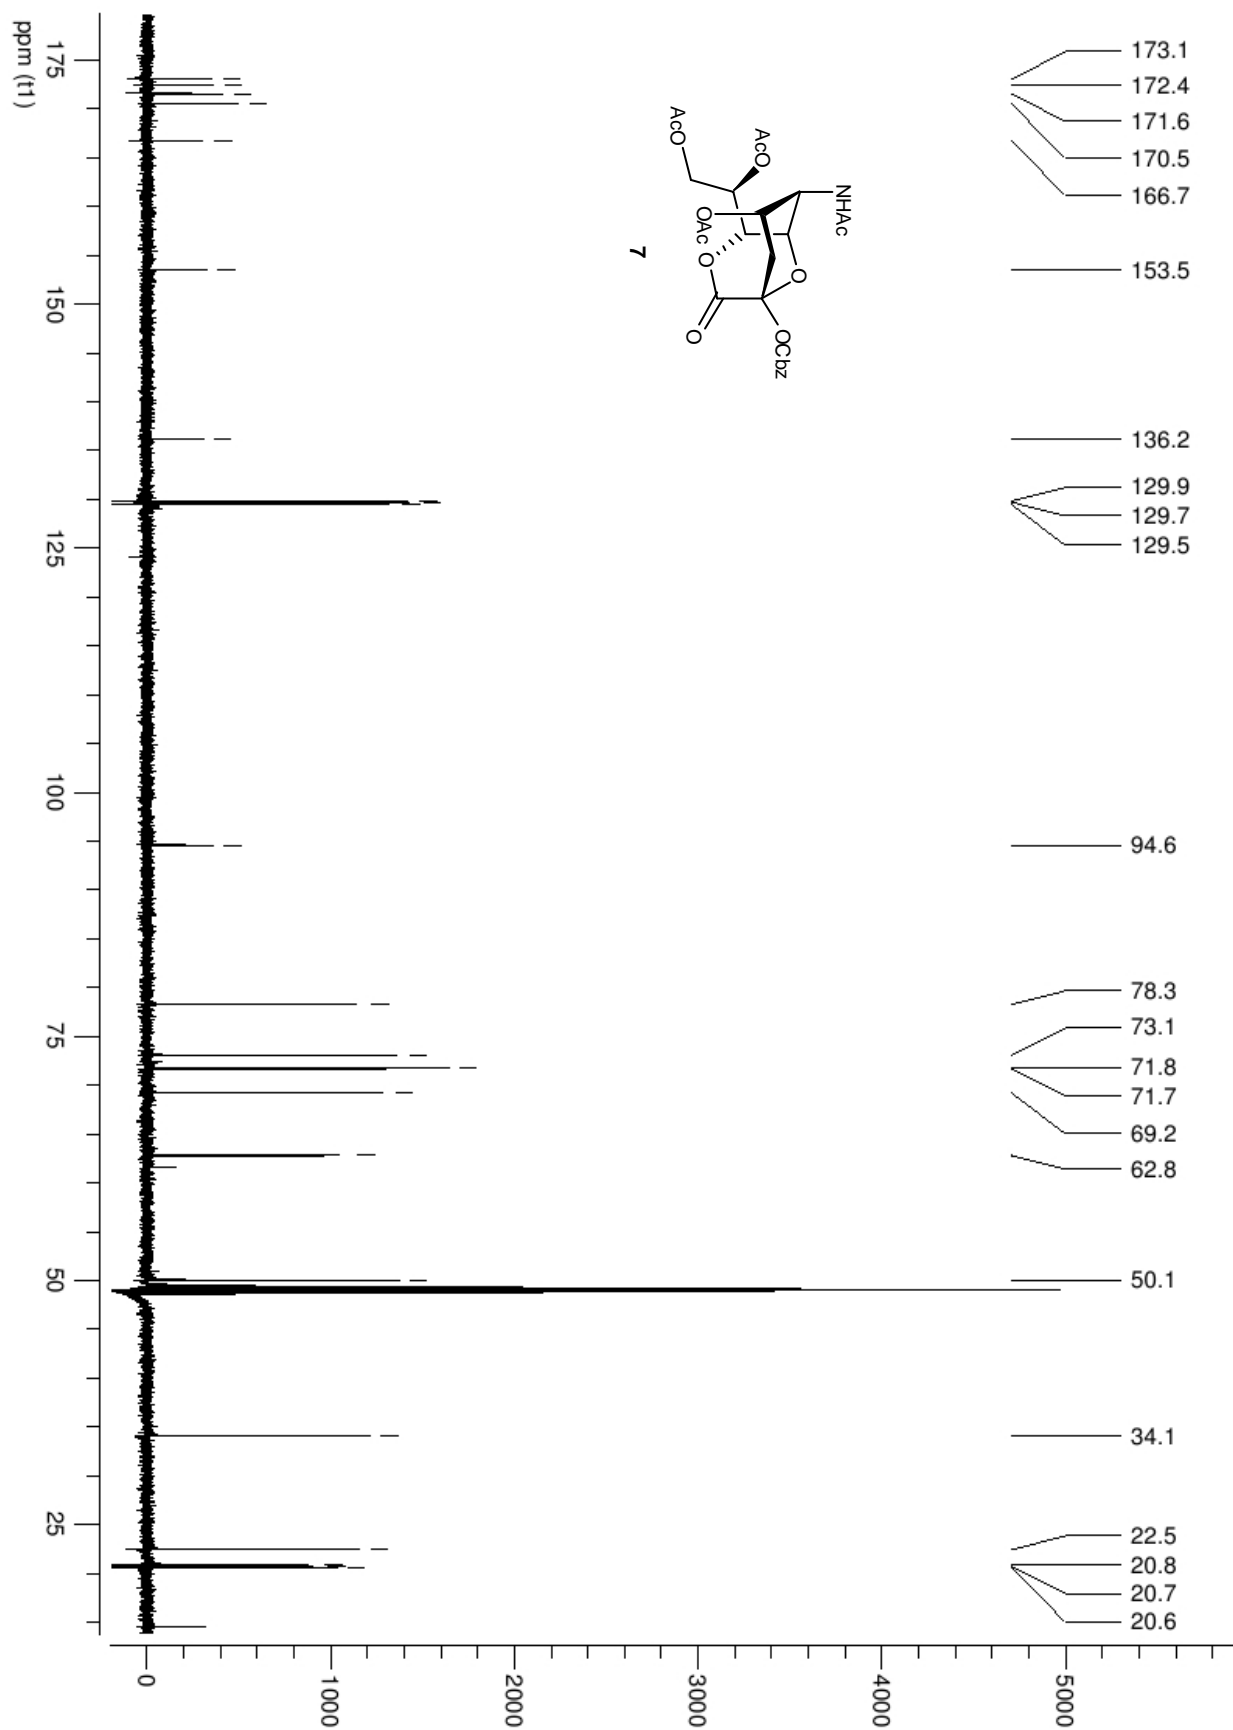

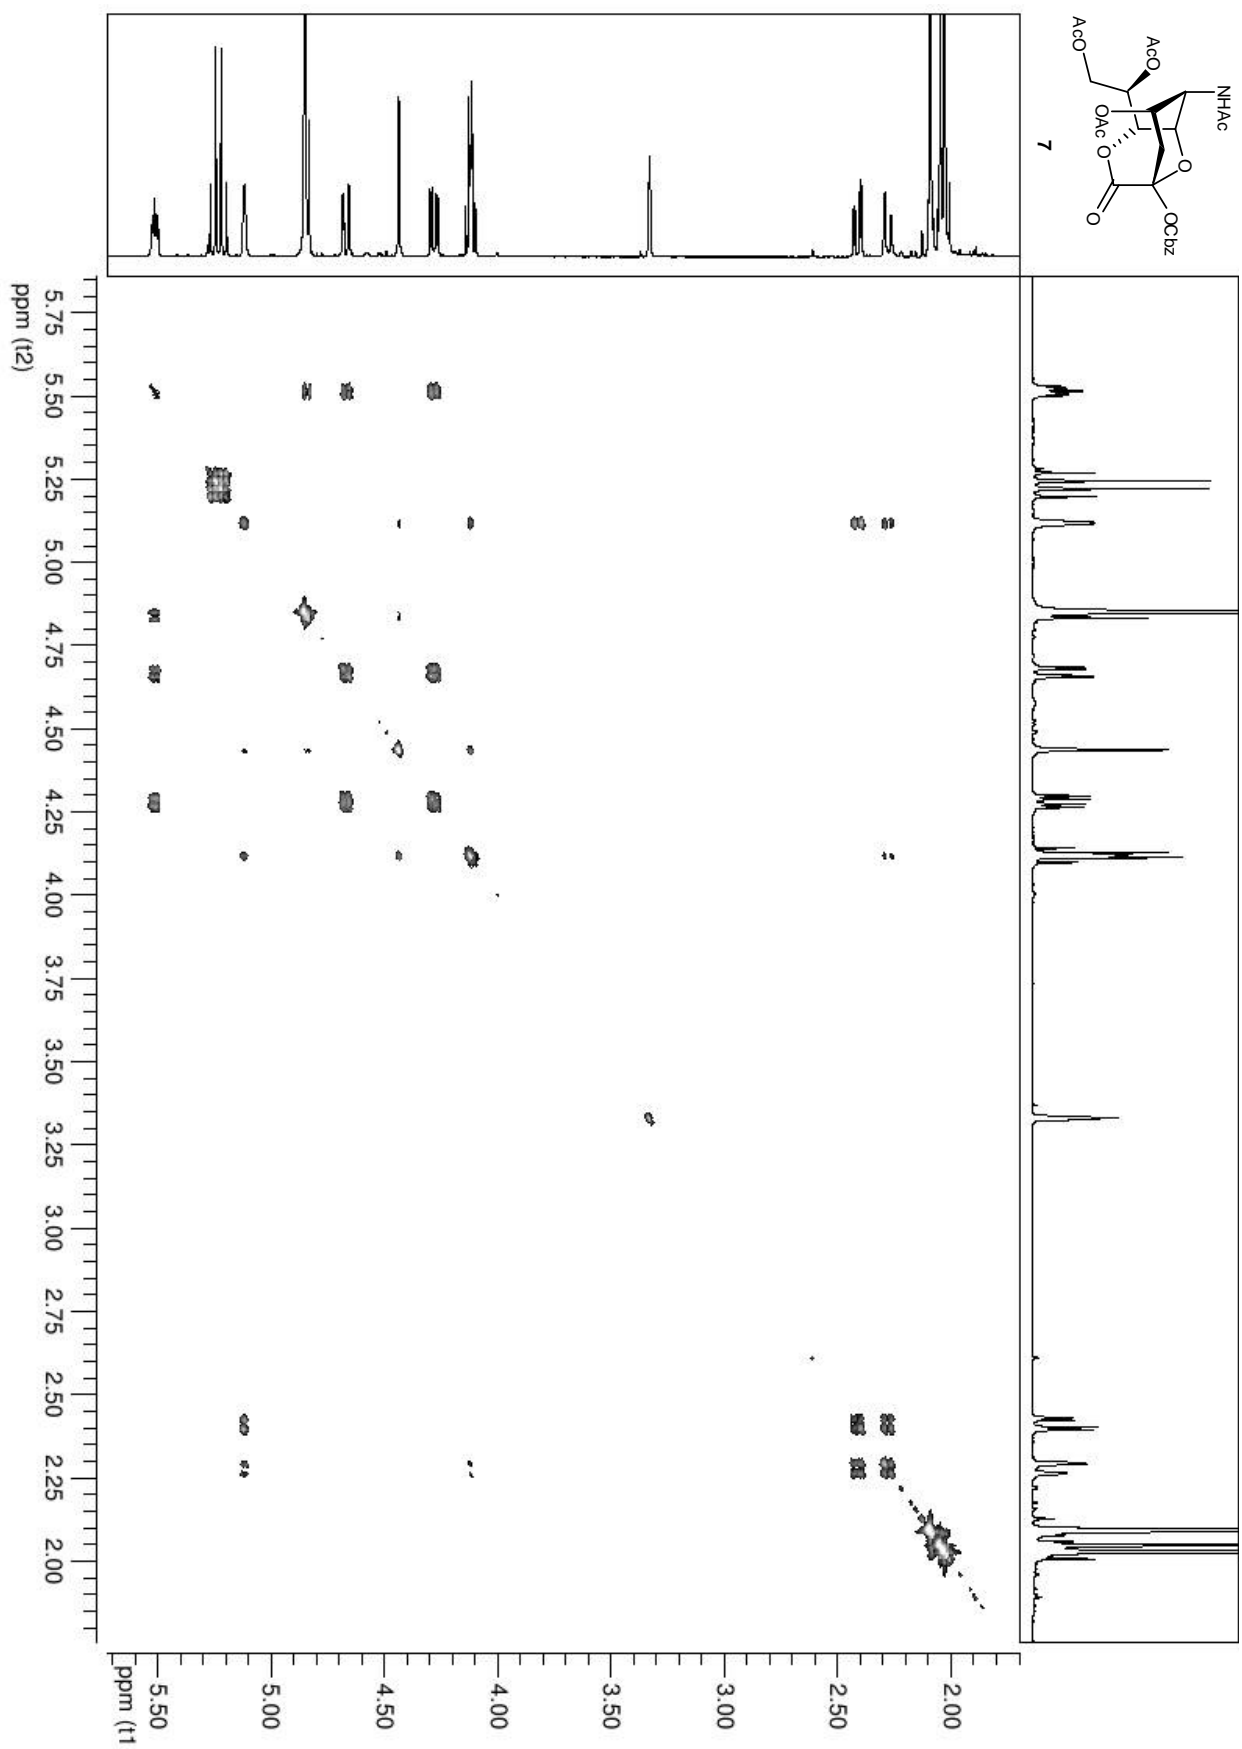



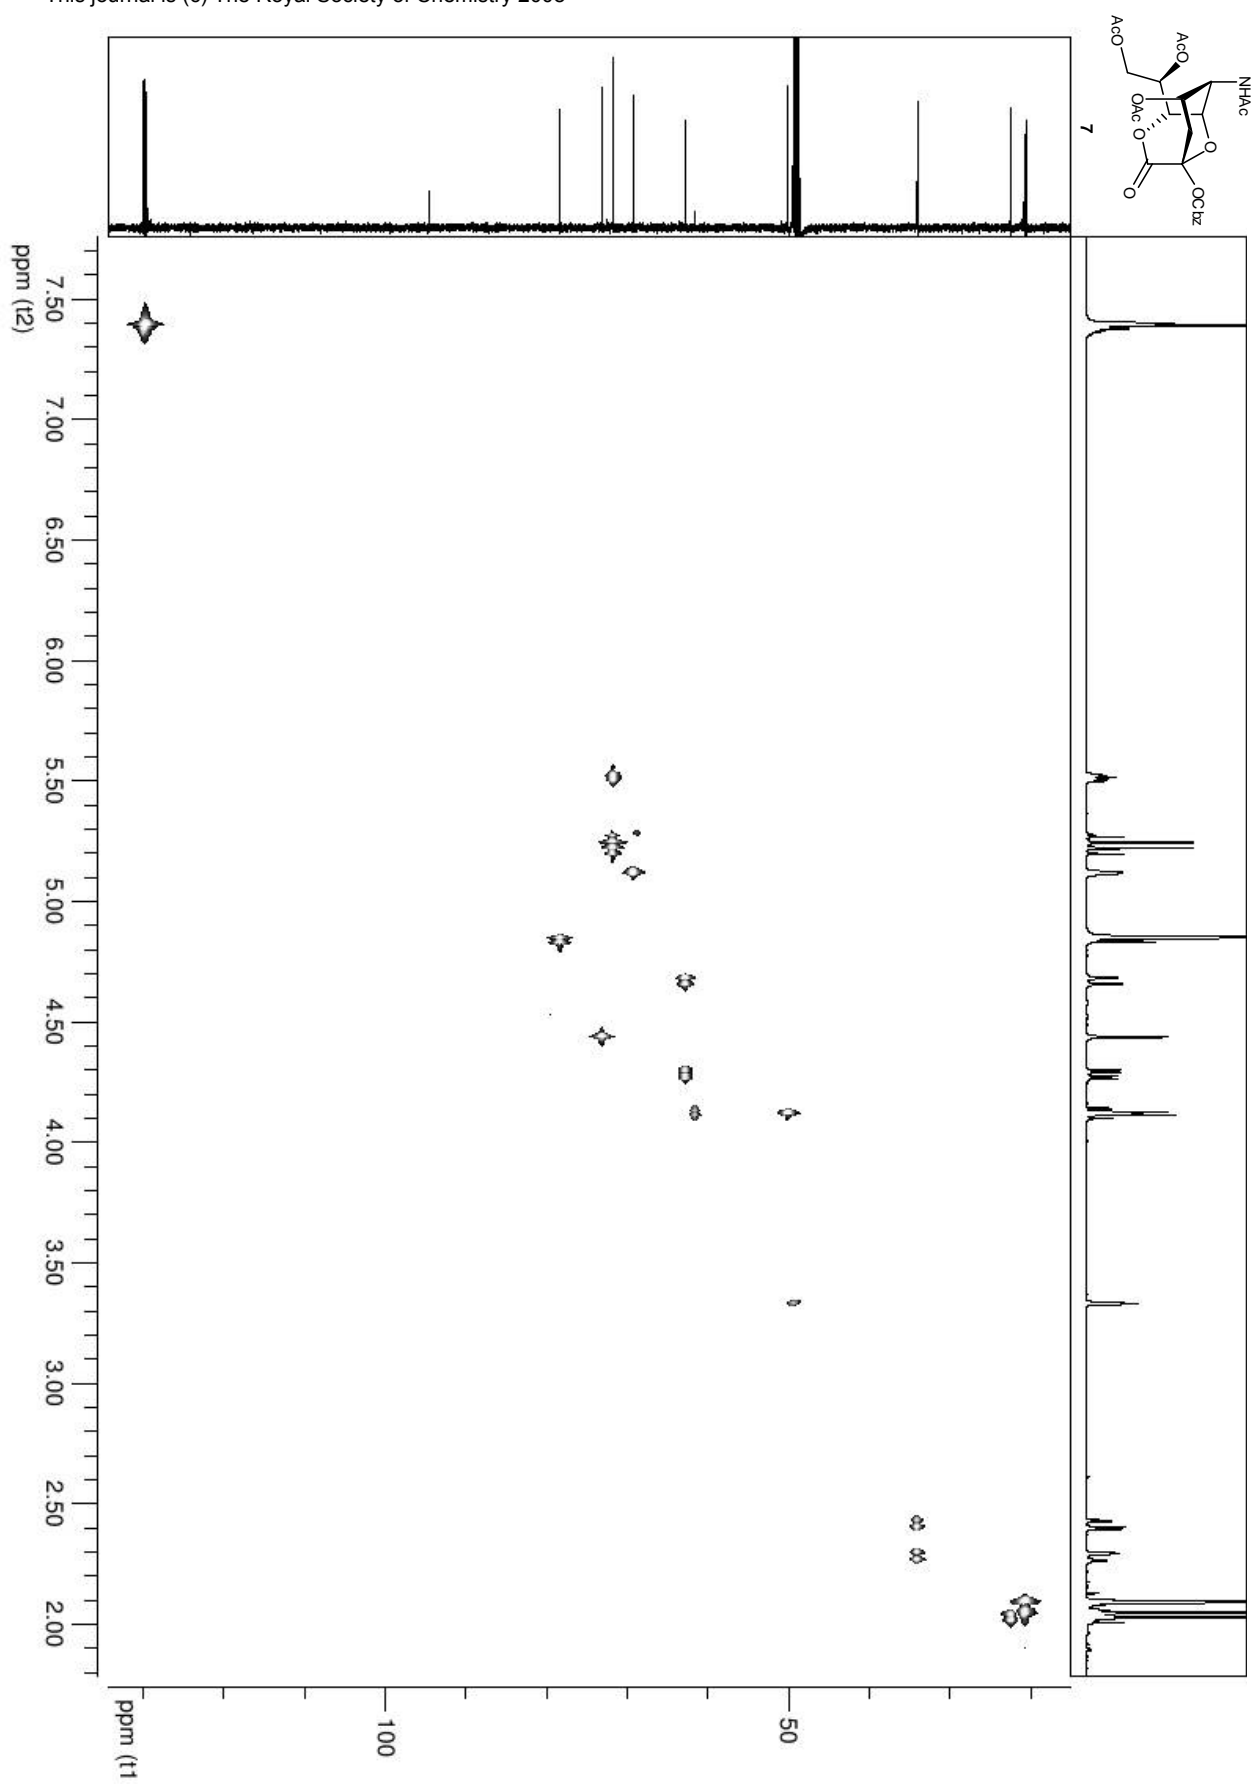

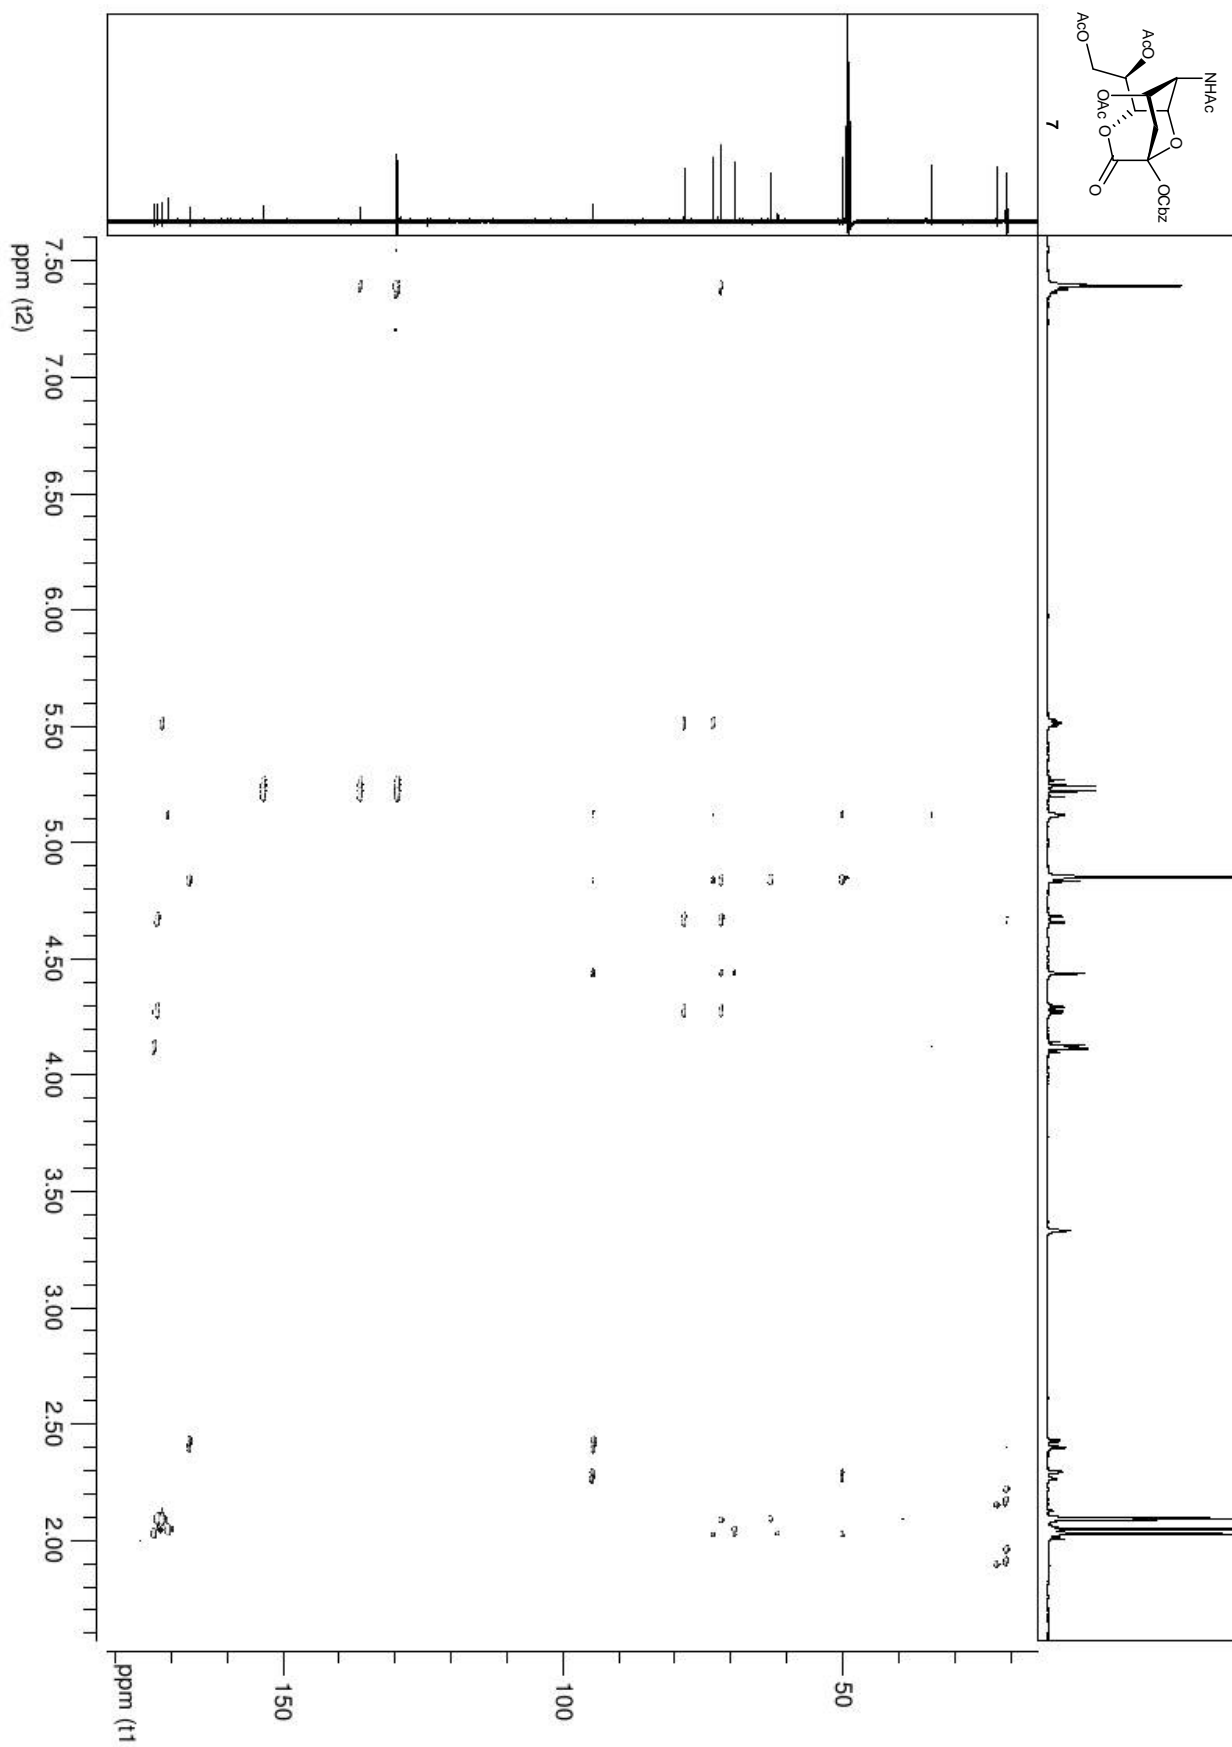

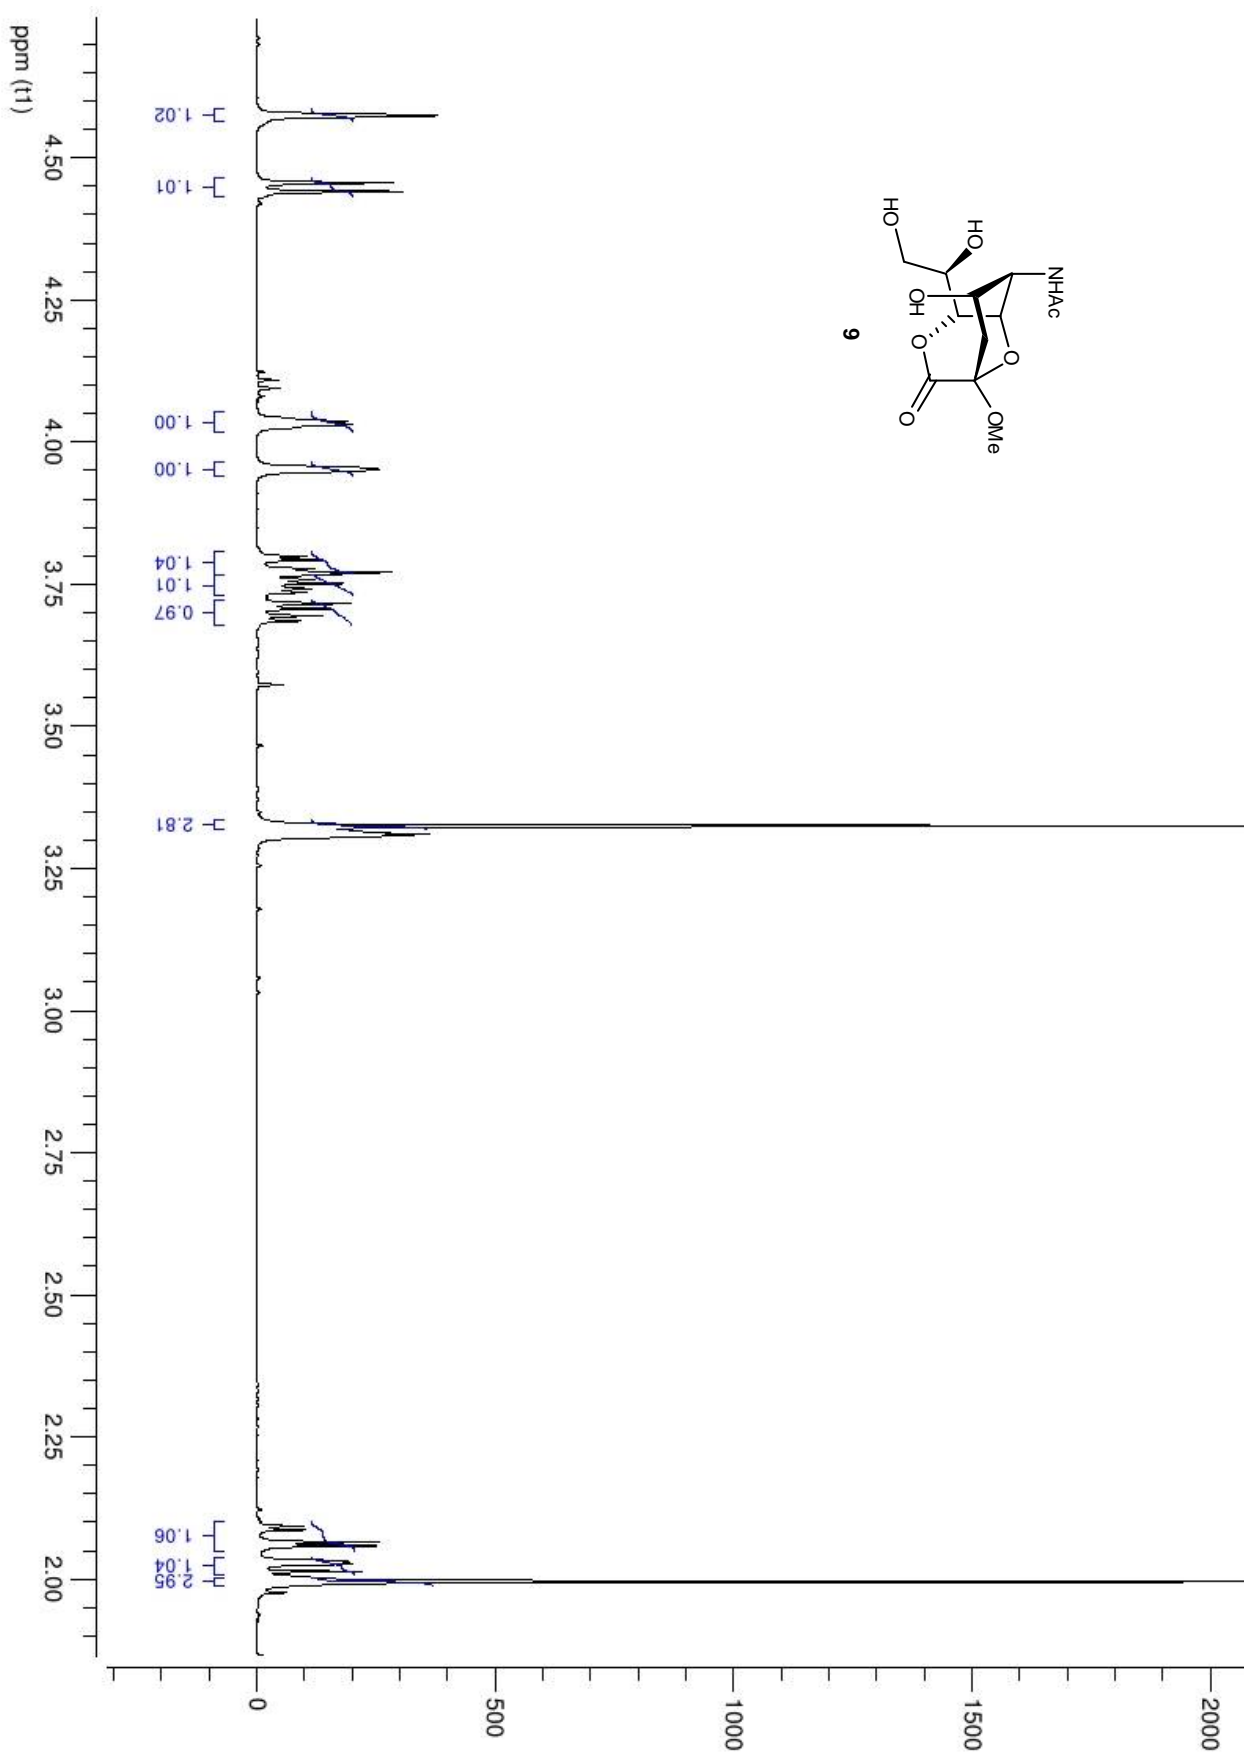

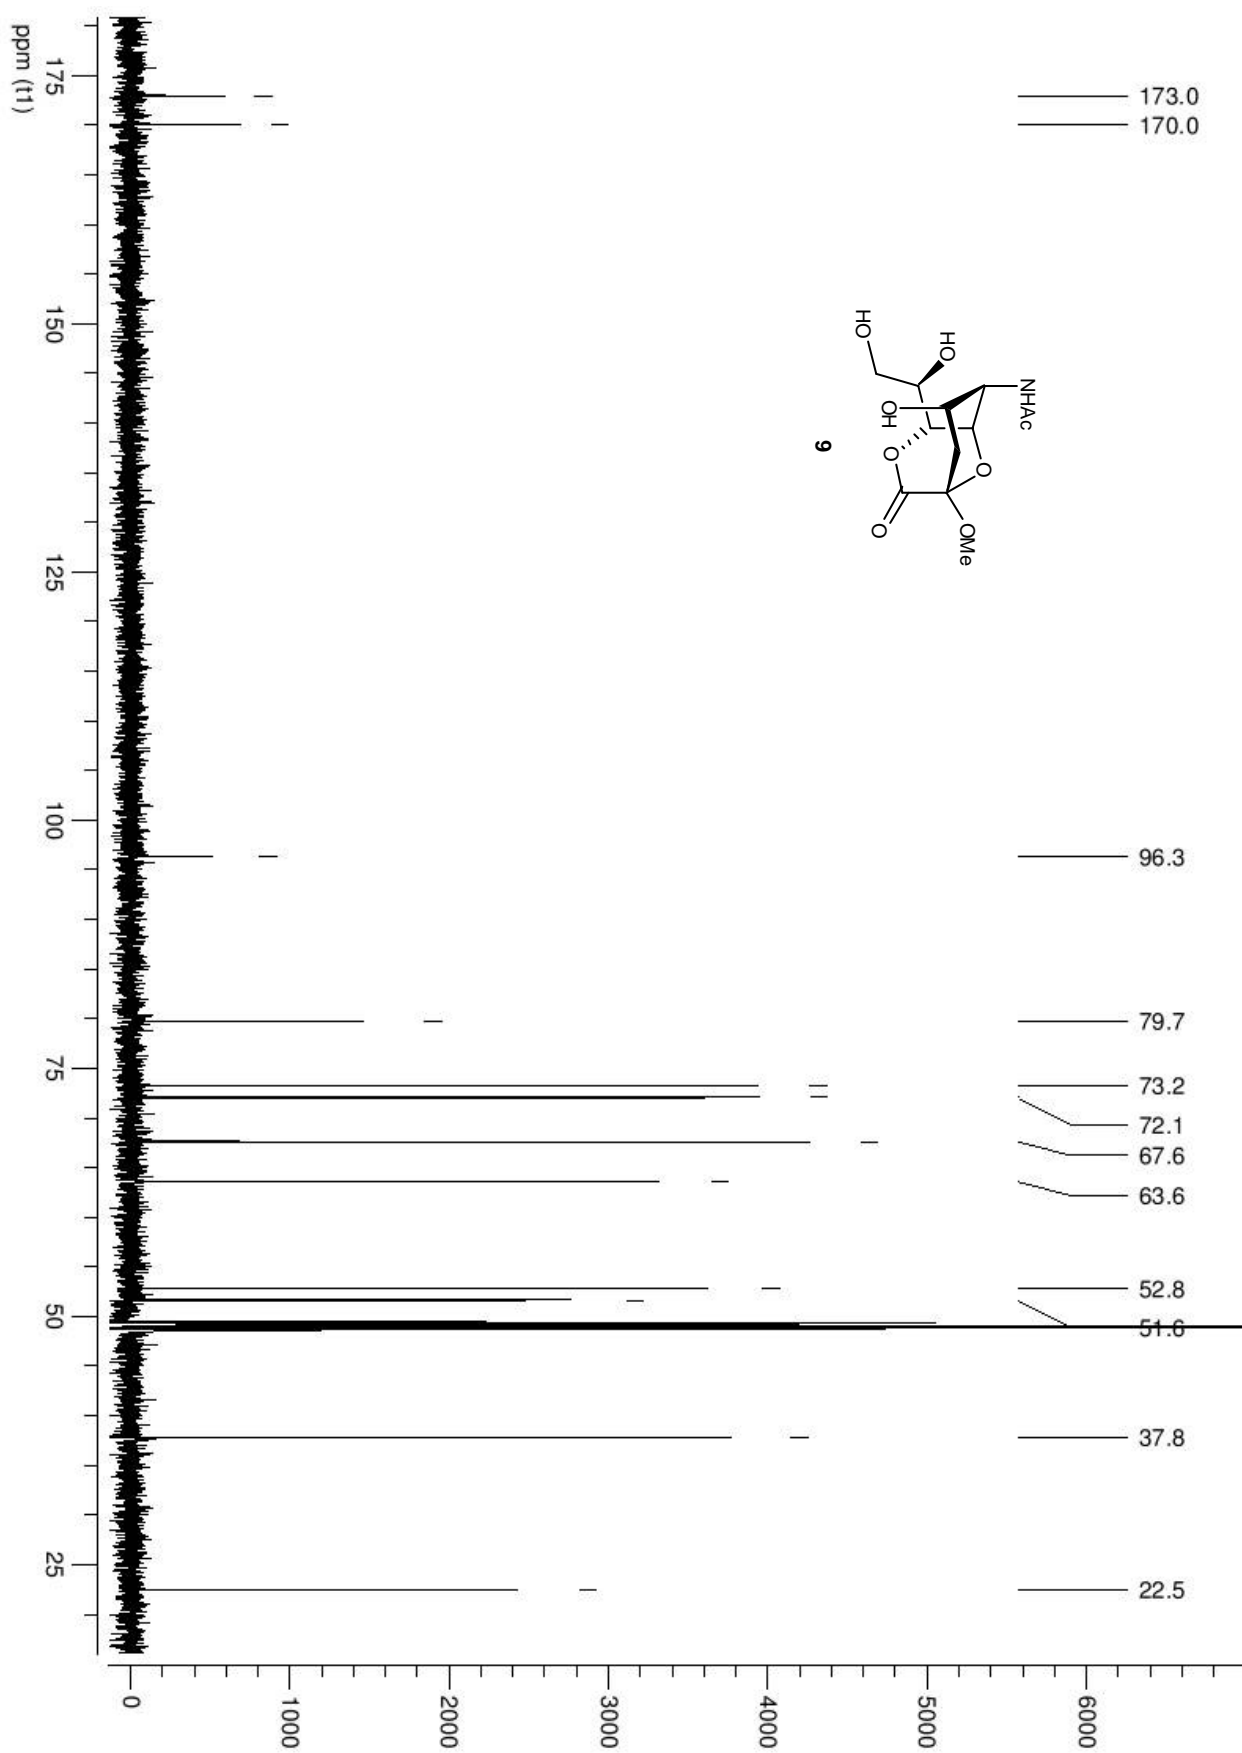

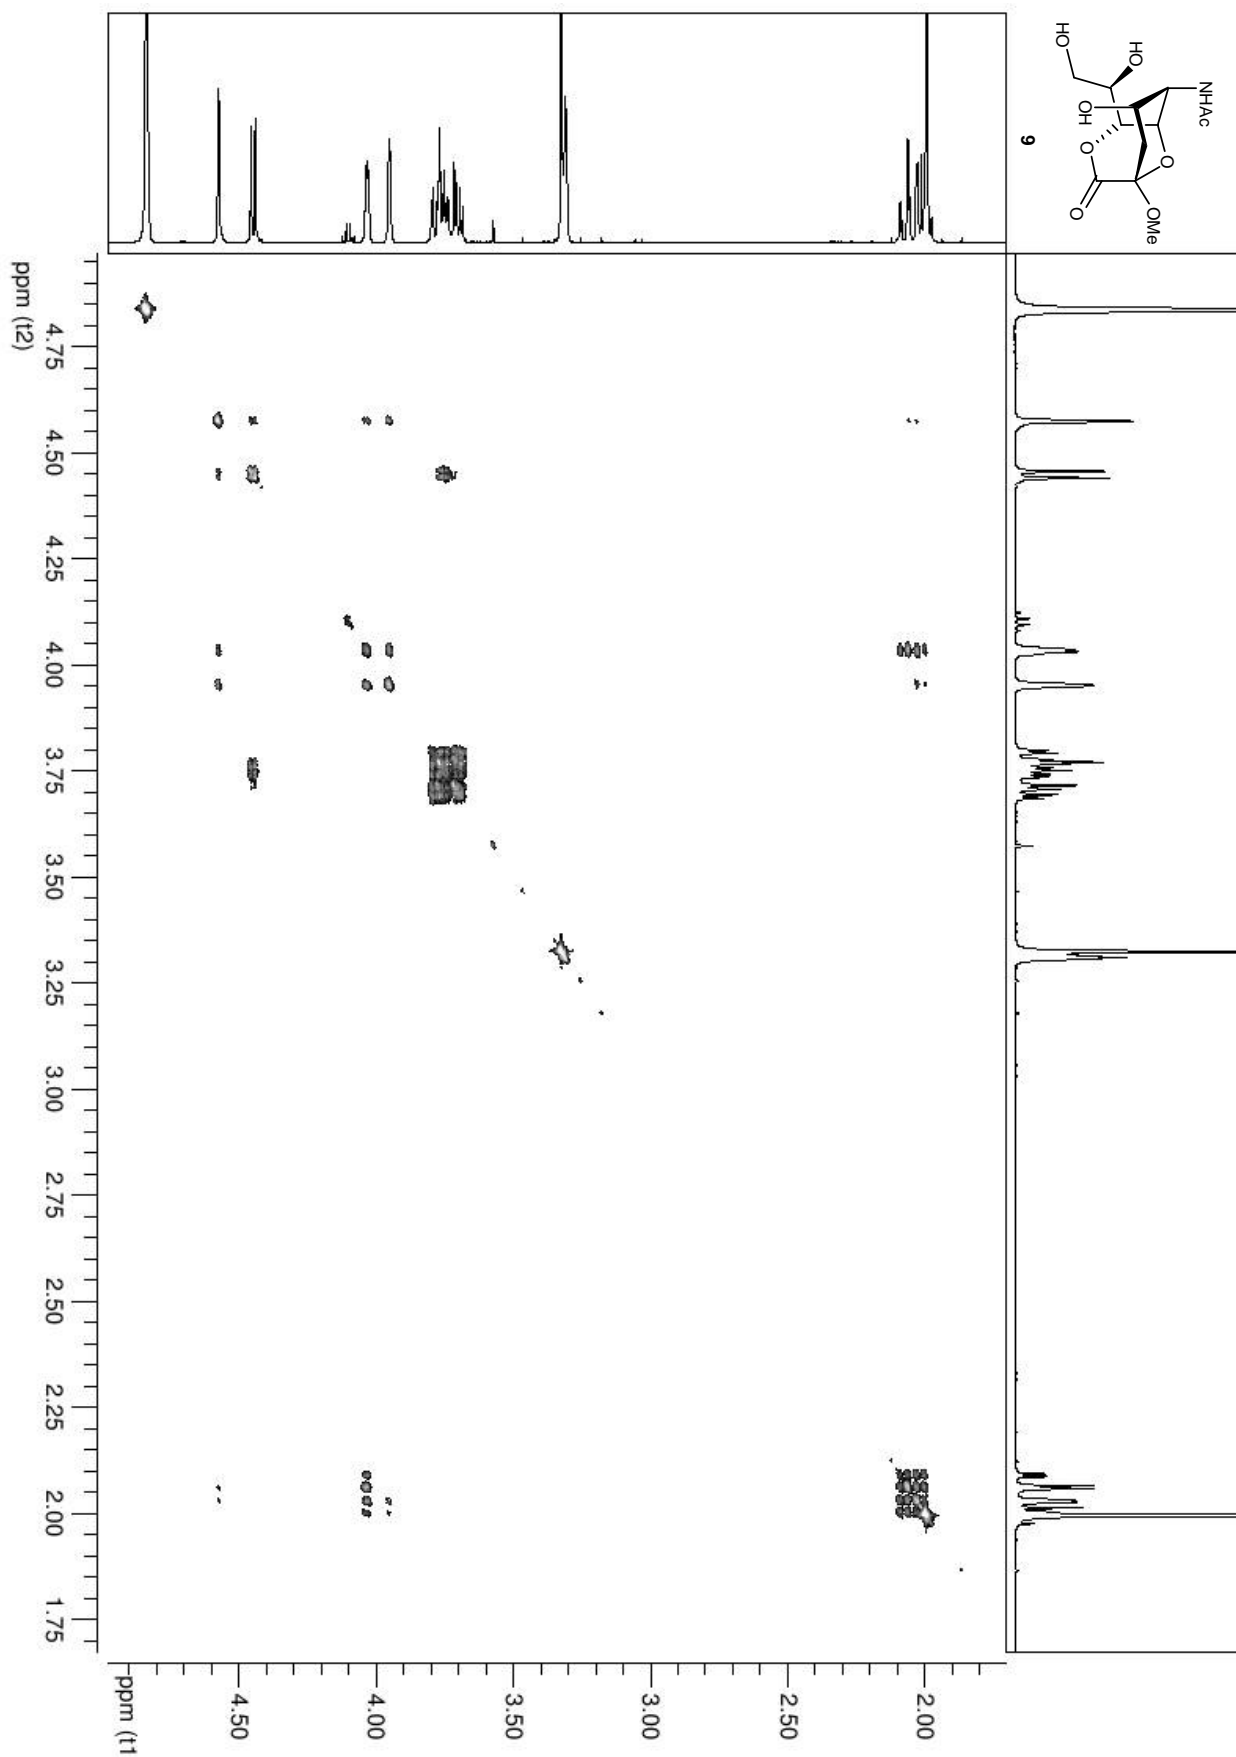

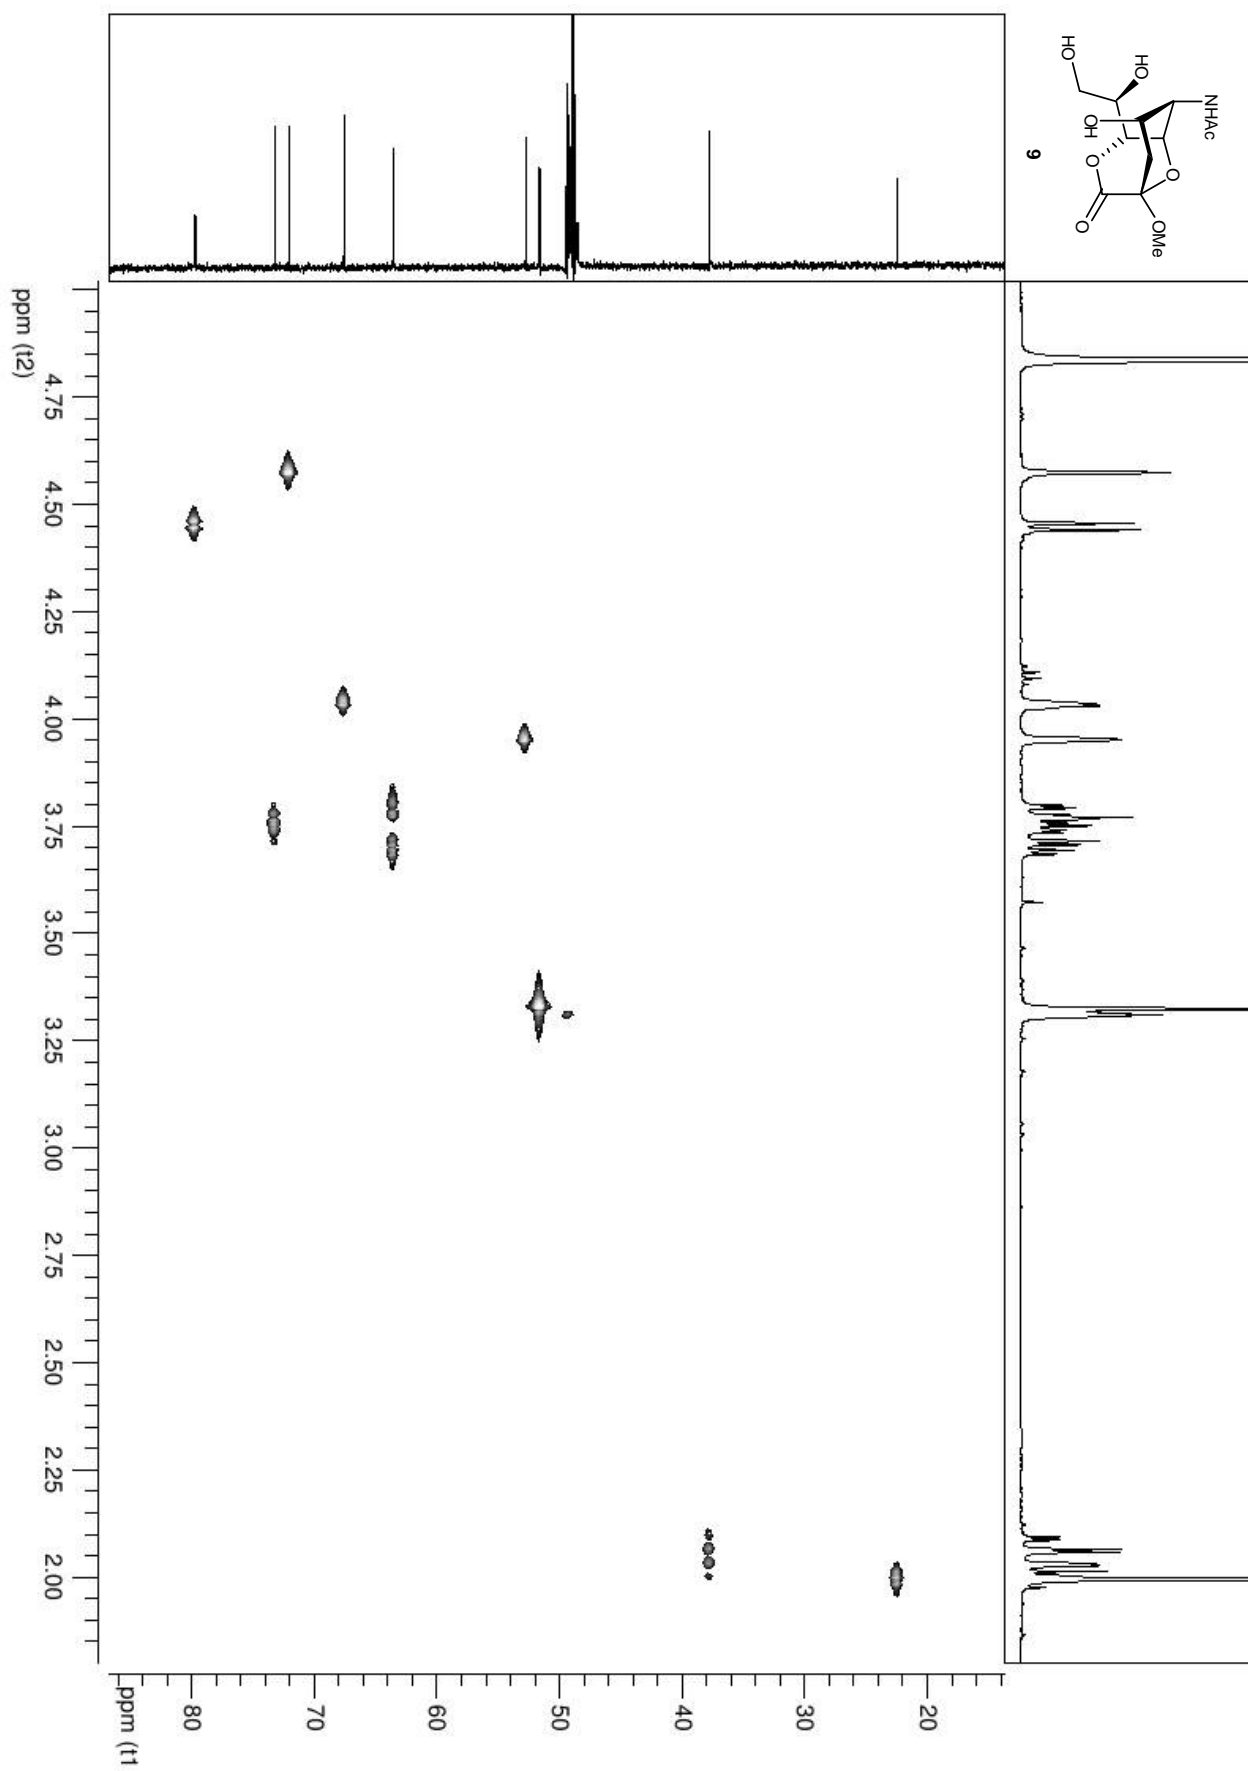

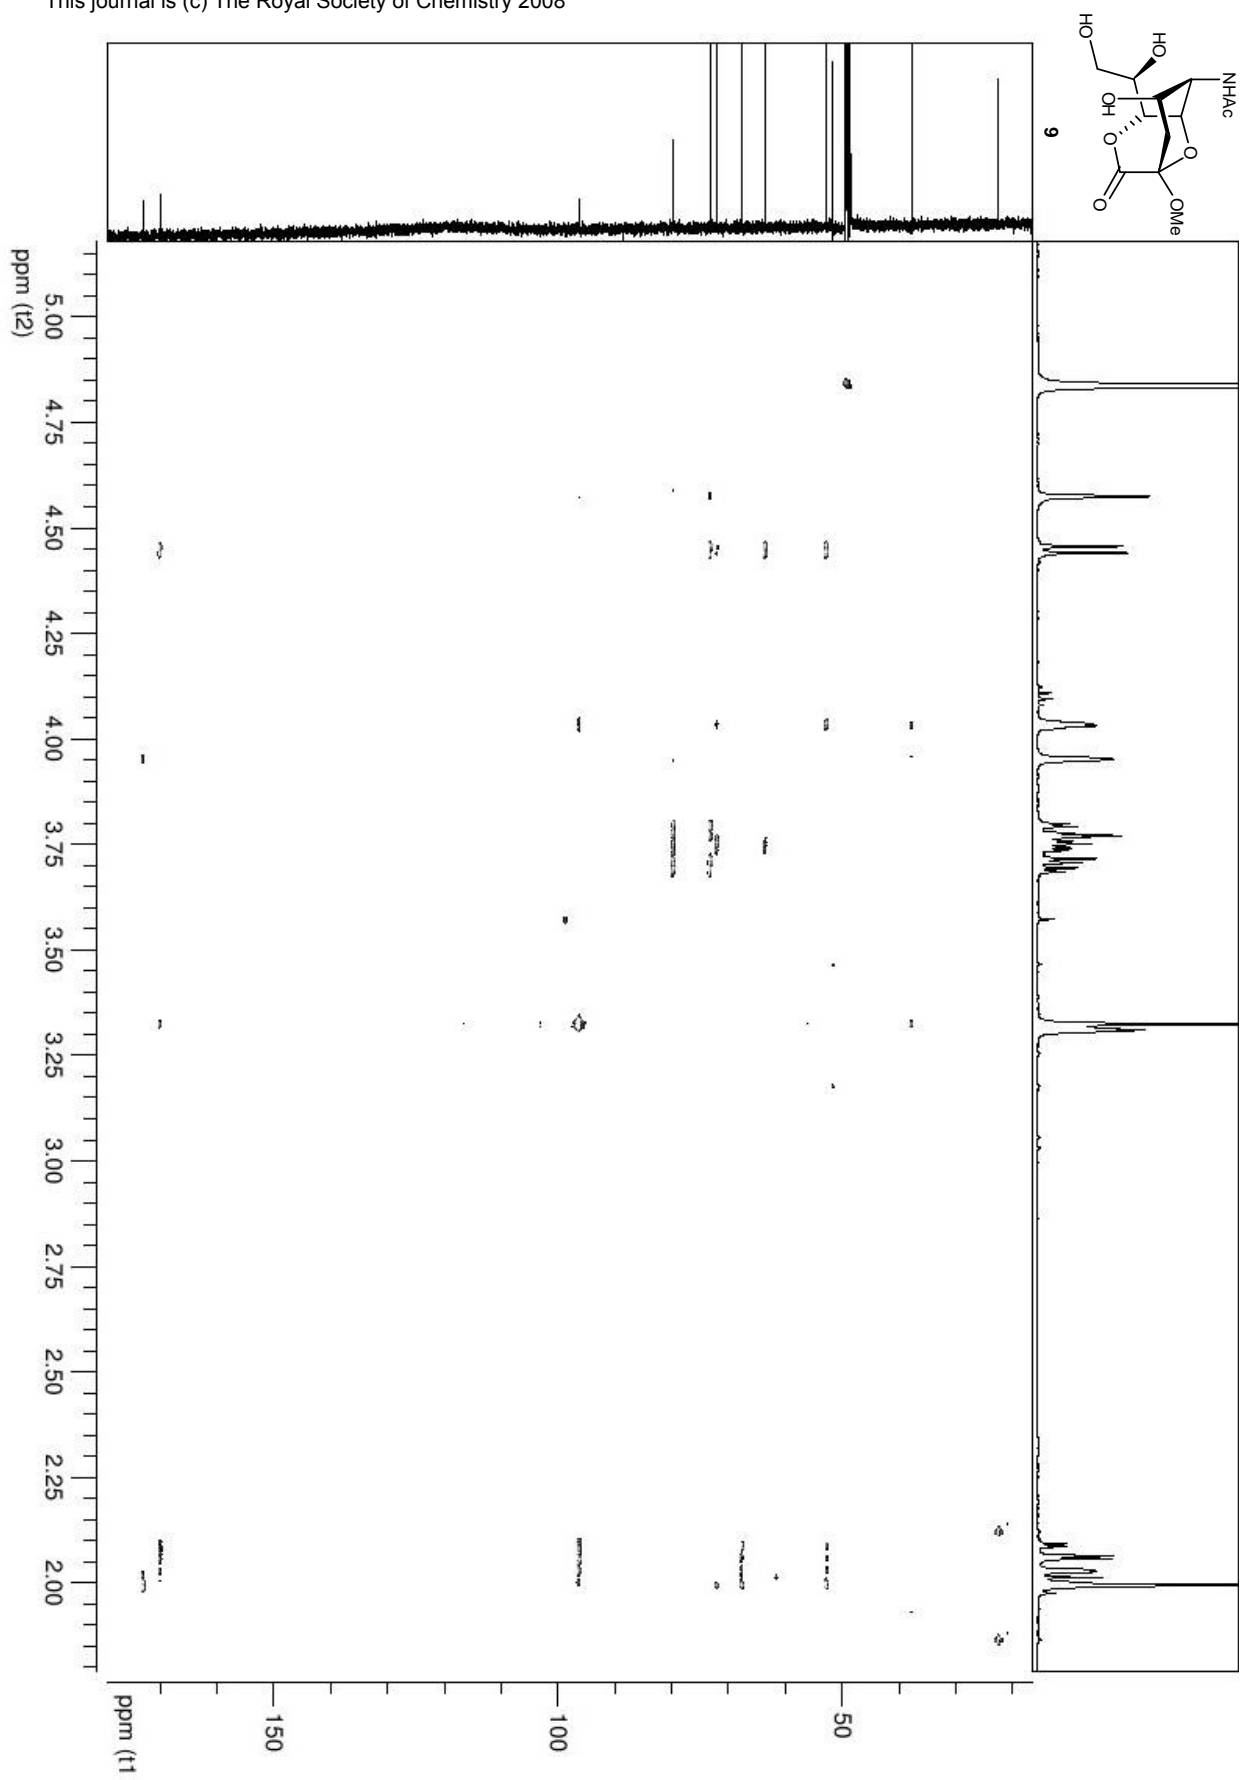

Supplement: b810447f.pdf [file b810447f.pdf]
